# **The pathological hallmarks of Alzheimer's disease derive from compensatory responses to NMDA receptor insufficiency**

**Selina Sohre and Bernd Moosmann**

Institute for Pathobiochemistry, University Medical Center of the Johannes  
Gutenberg University, 55099 Mainz, Germany.

Correspondence should be addressed to:

Bernd Moosmann, PhD

Tel: +49 6131 39 26707

Fax: +49 6131 39 20185

E-Mail: [moosmann@uni-mainz.de](mailto:moosmann@uni-mainz.de)

## Abstract

Alzheimer's disease is characterized by intracellular aggregates of hyperphosphorylated tau protein and extracellular plaques of amyloid  $\beta$  peptide, a product of APP processing. The origin of these pathological hallmarks has remained elusive. Here, we have tested the idea that both alterations, at the onset of the disease, may constitute compensatory responses to the same causative and initial trigger, namely NMDA receptor insufficiency. Treatment of rat cortical neurons with the specific NMDA receptor antagonist AP5 within 4 h caused a significant increase in tau phosphorylation at the AT8 and S404 epitopes as well as an increase in APP expression and A $\beta$ <sub>40</sub> secretion. Single intraperitoneal injections of the NMDA receptor open channel blocker MK-801 into wild-type mice reproduced all of these changes in a brain region-specific fashion either at latency 4 h or 24 h. Subchronic treatment with MK-801 for 6 weeks induced AT8, S404 and S396 immunoreactivity selectively in female mice. We conclude that the pivotal pathological alterations in Alzheimer's disease represent runaway physiological responses to persistently insufficient excitatory neurotransmission. In view of the evidence for excitatory insufficiency in trisomy 21 patients, PS1 mutation carriers and ApoE4 carriers, our data suggest a common pathomechanism behind familial, sporadic, and risk allele-triggered Alzheimer's disease. The potential of this mechanism to reconcile previous conflicting observations is discussed.

## Introduction

Despite intense efforts, Alzheimer's disease (AD) has remained an insufficiently understood disorder, which is evidenced by an extensive series of failures of drug candidates in clinical trials (Braak et al., 1999; Cummings et al., 2014; Herrup, 2015).

In general pathology, microscopically visible hallmarks of a disease often reflect exaggerated physiological responses to an invisible disease trigger rather than representing the disease origin by themselves. Frequently, these physiological responses are compensatory in nature, i.e. directed at the counterbalancing of the effect evoked by the original disease trigger or its removal. For example, in a typical form of serum amyloid A (SAA) amyloidosis, chronic infection with tuberculosis leads to a massive, but fruitless compensatory secretion of the anti-infectious SAA protein by the liver, which precedes and determines its erratic and often fatal deposition as cleaved amyloid A protein in kidney and gut (Westermarck et al., 2014).

Translating this reasoning to the hallmarks of AD, the idea was pursued that both APP expression and amyloid  $\beta$  ( $A\beta$ ) formation as well as tau phosphorylation may constitute initially purposeful physiological responses to a common, but unknown molecular trigger. If that trigger persisted nevertheless, both responses would become more and more enforced, with the result that exaggerated and eventually toxic concentrations were attained in the end.

In distilling the literature for the most likely such trigger as based on today's knowledge, we reached the conclusion that chronic antagonism of excitatory neurotransmission via NMDA receptors would be the most plausible candidate. In brief, this conclusion was drawn on the basis of the following evidence.

**Amyloid.** The most thoroughly described property of  $A\beta$  peptides is their induction of excitotoxicity at supraphysiological doses ranging from  $10^{-7}$  M to  $10^{-4}$  M, mostly after pharmacological application in vitro or mutant APP overexpression in vivo (Mattson et al., 1992; Harkany et al., 2000; Danysz and Parsons, 2012). Supposing that this potent excitotoxic activity at supraphysiological doses was a mirror image of  $A\beta$ 's physiological role at  $10^{-10}$  M to  $10^{-9}$  M concentrations, the "maximum parsimony" hypothesis was derived that physiological  $A\beta$  should be viewed as glutamatergic sensitizer, probably mediated through NMDA receptors. In fact, work from three independent laboratories has

shown that physiological, picomolar concentrations of A $\beta$  rapidly enhance NMDA receptor-dependent long-term potentiation (LTP) in vitro and improve learning and memory formation in vivo (Puzzo et al., 2008; Garcia-Osta and Alberini, 2009; Morley et al., 2010). Supraphysiological, transgenic concentrations of A $\beta$  have often been seen to later elicit the opposite effect, probably due to enhanced NMDA receptor internalization (Snyder et al., 2005) in an effort to prevent looming excitotoxicity.

**Tau.** Tau binds to and stabilizes microtubules (Wang and Mandelkow, 2016), but also physically impairs kinesin migration (Dixit et al., 2008) and thus anterograde transport of newly synthesized APP (Stamer et al., 2002) and NMDA receptors (Setou et al., 2000). Phosphorylation generally dissociates tau from microtubules, potentially facilitating protein transport, but at the danger of microtubule disintegration (Dixit et al., 2008; Wang and Mandelkow, 2016). Moreover, tau phosphorylation has been reported to entail its redistribution into dendritic structures (Hoover et al., 2010), where it is thought to sensitize NMDA receptors through phosphorylation by Src kinase fyn (Ittner et al., 2010). Supraphysiological tau accumulation in dendritic spines might then induce excitotoxicity (Ittner et al., 2010) or enhanced receptor internalization (Hoover et al., 2010). Notably, tau reduction has been described to suppress seizure activity and hyperexcitability in different disease models in vivo (Roberson et al., 2007; Holth et al., 2013) and to diminish glutamate excitotoxicity in vitro (Miyamoto et al., 2017). Hence, tau protein and its activated, redistributed phospho-forms appear to physiologically enhance excitatory neurotransmission, which implies that glutamatergic insufficiency might induce tau phosphorylation as a normal homeostatic response.

Therefore, the effect of a selective pharmacological blockade of NMDA receptors was tested under fully physiological, non-transgenic conditions in vitro and in vivo. It was found that this intervention led to a rapid and concomitant induction of APP expression, A $\beta$  formation and tau phosphorylation on AD-related epitopes.

## Results

Cortical neurons from E17 Sprague-Dawley rats were prepared, cultivated to maturity in Neurobasal medium for 14-17 days and then transferred to defined physiological Ringer solution for experimental investigation. Spiking activity under comparable conditions (Sun et al., 2010) arose at around day 7 and started to plateau at day 12, whereas coordinated bursting activity reached a stable maximum after day 10 (Sun et al., 2010). Consequently, investigations dependent on spontaneous neuronal activity were deemed feasible in these cultures. Since depolarization with 25 mM potassium ( $K^+$ ) is known to reversibly increase spontaneous NMDA receptor-dependent activity in vitro (Heck et al., 2008), all experiments were done under standard (2.5 mM  $K^+$ ) as well as depolarizing (27.5 mM  $K^+$ ) conditions.

Treatment of these cortical cultures with 100  $\mu$ M AP5, a highly specific competitive NMDA receptor antagonist (Watkins et al., 1990), within 4 h of incubation induced a significant increase in tau phosphorylation at the AT8, S404 and S396 epitopes (Fig. 1a-c). Separate incubation with glutamatergic agonists, either 5  $\mu$ M NMDA or 5  $\mu$ M L-glutamate, did not significantly reduce tau phosphorylation below the baseline level, however (Fig. 1b,c). Consistent with the NMDA receptor binding affinities of the employed compounds, the effect of co-incubation with these agonists and AP5 was dominated by the presence of AP5 (Fig. 1b,c).  $K^+$ -induced depolarization had no visible influence on the degree of tau phosphorylation, potentially due to the absence of the NMDA receptor blocker  $Mg^{2+}$  in the measurement Ringer solution. Combined analysis of six independent cell cultures, three for each  $K^+$  concentration, yielded a significance level of  $p_2 < 0.001$  (by Two-way ANOVA) for the induction of tau phosphorylation by AP5 at all three investigated phospho-sites (Fig. 1c). Our data concur with earlier reports of an NMDA receptor mediated regulation of tau phosphorylation in rat cortical (Fleming and Johnson, 1995) and hippocampal (Allyson et al., 2010; De Montigny et al., 2013) slices.

To monitor the potential role of cytotoxicity and metabolic modulation by the employed glutamate receptor ligands, the cells were examined microscopically (Fig. 1d), immunostained for the neuron-specific marker protein MAP-2 (Fig. 1e), and they were analyzed by the MTT metabolic activity assay (Fig. 1f). Irrespective of the treatment group, cells were morphologically indistinguishable from the

control after 4 h (Fig. 1d). Quantification of MAP-2 positive cells did not reveal any differences under high K<sup>+</sup> conditions, albeit a significant effect ( $p_2 < 0.039$ ) towards higher cell numbers in AP5 treated groups was seen in low K<sup>+</sup> cultures (Fig. 1e). Conversely, AP5 treatment had no significant effect in the MTT metabolic activity assay, whereas glutamatergic agonist treatment involved a significant reduction in MTT conversion ( $p_1 = 0.042$  for low K<sup>+</sup>,  $p_1 = 0.009$  for high K<sup>+</sup>) (Fig. 1f). As evident from Fig. 1e and 1f, modulatory effect sizes were general small and cannot explain the effects of AP5 in the above tau phosphorylation experiments. Still, the glutamate-alone cultures may have been influenced to some extent by early excitotoxicity or metabotropic glutamate receptor ligation, with unknown consequences as regards tau phosphorylation.

The above-described 4 h cortical cultures were furthermore analyzed for APP expression and A $\beta$  secretion. Treatment with AP5 evoked a highly significant induction of APP expression (Fig. 2a,b) in low and high K<sup>+</sup> cultures ( $p_2 < 0.001$  in both cases), whereas glutamatergic agonist treatment had no significant effect as per Two-way ANOVA. Nevertheless, a lower average expression of APP in the agonist-alone treated cultures was noted (Fig. 2a,b). A combined evaluation of APP expression in all six independent cell cultures is provided in Fig. 2c. Analysis of these six cultures for A $\beta$  secretion demonstrated a significant induction of A $\beta_{40}$  formation by AP5 treatment ( $p_2 = 0.003$ ), whereas A $\beta_{42}$  levels were unaffected (Fig. 2d). Hence, inhibition of excitatory communication via NMDA receptors in vitro evokes a rapid and concomitant response of tau phosphorylation, APP expression and A $\beta$  formation.

Wild-type male “black 6” mice (C57BL/6Jrj from Janvier) at an age of 10 weeks were chosen to investigate the behavior of these molecules after reversible NMDA receptor blockade in vivo. For this purpose, the BBB-permeable and specific NMDA antagonist MK-801 was injected intraperitoneally (ip) at a concentration of 1.0 mg/kg, followed by stereotactic brain tissue preparation after 4 h or 24 h. In accordingly treated rats, MK-801 in the brain peaked within 10-30 min after ip injection and was eliminated with a half-life of 2 h (Vezzani et al., 1989), which corresponds to the observed hyperactivity phenotype of the here studied mice that resolved after approximately 2 h. Analysis of tissue-specific tau phosphorylation (Fig. 3) indicated that the S404 epitope was significantly induced in the hippocampus ( $p = 0.022$  by One-way ANOVA) and the cortex ( $p = 0.016$ ).

Moreover, AT8 phosphorylation was induced in the cortex after 24 h ( $p = 0.003$ ). The thalamus did not exhibit any changes in response to MK-801 treatment (Fig. 3e).

APP expression in these mice (Fig. 4) was significantly induced in the hippocampus ( $p = 0.001$ ) and modulated in the cortex ( $p = 0.007$ ), whereas the thalamus showed a loss of expression ( $p = 0.041$ ). Analysis of detergent-soluble A $\beta$  levels yielded significant effects in terms of a temporally reversible induction of A $\beta_{40}$  in the hippocampus ( $p = 0.029$ ) and the retrosplenial cortex ( $p = 0.016$ ) (Fig. 4e). A $\beta_{42}$  was reversibly induced only in the thalamus ( $p < 0.001$ ), while the hippocampus and the cortex exhibited a late reduction of A $\beta_{42}$  ( $p = 0.010$  for hippocampus,  $p = 0.034$  for cortex) (Fig. 4f). Total A $\beta$  levels calculated per mouse and tissue as sum of A $\beta_{40}$  and A $\beta_{42}$  are shown in Fig. 4g and were significantly modulated in the hippocampus ( $p = 0.015$ ), the thalamus ( $p = 0.014$ ), the retrosplenial cortex ( $p = 0.019$ ) and the caudate/putamen ( $p = 0.044$ ). The general picture of these analyses is that A $\beta$  was only induced in certain tissues and exclusively after 4 h, while MK-801 was actually present in the tissue, whereas elimination of the drug resulted in a return to baseline levels or even lower levels than before. The rapid elevation and subsequent drop of soluble A $\beta$  is consistent with its short half-life of less than 2 h in vivo (Abramowski et al., 2008). Moreover, it concurs with seminal findings that synaptic activity at NMDA receptors regulated A $\beta$  secretion into the interstitial fluid in APP<sup>swe</sup>/PS1 mice (Verges et al., 2011) and inhibited amyloidogenic APP processing in cortical cell culture (Hoey et al., 2009).

Remarkably, the reversible excitatory blockade was apparently entrained in certain tissues in terms of a long-term induction of APP (especially in the hippocampus) and AT8 (especially in the cortex). A similar phenomenon of a rapid and persistent induction of cortical APP synthesis after loss of activating subcortical innervation has long been noted (Wallace et al., 1993). These observations are puzzling since APP does not tend to accumulate, but rather exhibits a short half-life (primary culture intracellular pool:  $\sim 0.5$  h; surface pool:  $\sim 4$  h) (Storey et al., 1999). What may be the functional role of the prolonged induction of APP?

We tested the hypothesis that proteolytic fragments other than A $\beta$  may account for the long-term induction of APP after transient blockade of excitatory

neurotransmission. Therefore, the expression of the main APP secretase proteins ADAM10, BACE1 and PS1 was analyzed by Western blotting (Fig. 4h). BACE1 was unregulated in the three investigated tissues. In contrast, the A $\beta$ -producing  $\gamma$ -secretase subunit PS1 was reversibly induced in the cortex ( $p = 0.010$ ) and belatedly decreased in the hippocampus ( $p = 0.023$ ), which indicates that A $\beta$ 's physiological role is to respond to excitatory insufficiency acutely, but not chronically. This interpretation is supported by the observation that ADAM10, an A $\beta$ -preventing  $\alpha$ -secretase, was persistently induced in the cortex ( $p = 0.026$ ) and the thalamus ( $p = 0.043$ ). The ensuing formation of the potent synaptotrophic effector sAPP $\alpha$  (Moechars et al., 1996; Bell et al., 2008; Nicolas and Hassan, 2014) or the known glutamate metabolism enhancer and synaptic regulator AICD (Schrenk-Siemens et al., 2008; Bukhari et al., 2017) may be the purpose of this induction, to permanently resolve the excitatory blockade.

The observed tissue-specific responses of tau and APP following NMDA receptor blockade resemble patterns seen in AD. The inertia of the thalamus to increase tau phosphorylation (Fig. 3e) and its selective induction of A $\beta_{42}$  formation (Fig. 4f) correlate with the fact the thalamus in AD shows amyloid pathology very early, in fact as early as the hippocampus, but essentially lacks neurofibrillary tangles until very late in the disease (Aggleton et al., 2016). Moreover, the anterior thalamus is functionally interdependent with the retrosplenial cortex, one of the first areas affected in prodromal AD (Nestor et al., 2003). The impairment of both regions is thought to account for the early loss of episodic memory in the disease (Aggleton et al., 2016). The retrosplenial cortex also was the most responsive region in terms of A $\beta_{40}$  induction in the current study (Fig. 4e).

In physiology and biochemistry, adaptive responses to pulsatile challenges often become weaker due to habituation. In the present paradigm, drug elimination may become accelerated, or the brain may reinforce its general capacity to endure NMDA receptor blockade, potentially by means unrelated to the AD-related molecules examined here. To investigate whether the AD-related molecules were indeed limiting and relevant after prolonged expose, the effect of repeated, three-times-weekly injections of MK-801 (1.0 mg/kg) over 6 weeks was studied in male and female wild-type mice. Analysis was done approximately 24 h after the last injection ( $\sim 10$  half-lives), to exclusively detect changes persisting in the absence of the drug. In fact, we did not find significant differences between the



treated group and the control in male mice treated for 6 weeks. Specifically, the 24 h elevations in hippocampal APP and S404 phosphorylation as well as cortical AT8 and S404 phosphorylation (Fig. 3b,d; Fig 4d) were absent (data not shown). Thus, ~16-week-old male mice that had been treated with MK-801 for 6 weeks appeared to be capable of full habituation. With prolonged duration of treatment, however, habituation capacity started to decline, since mice treated with MK-801 for 12 weeks (and analyzed at an age of ~22 weeks) displayed increased cortical AT8 ( $p = 0.039$  by One-way ANOVA) and S404 ( $p = 0.011$ ) phosphorylation again (Fig. 5c,d); APP expression in these mice was yet unchanged in the hippocampus and significantly lowered in the cortex ( $p = 0.039$ ) (Fig. 5e).

In contrast to male mice, female mice treated under the 6-week-paradigm did demonstrate significantly induced AT8 phosphorylation in the hippocampus ( $p = 0.004$ ) (Fig. 6a,b) as well as S404 phosphorylation in the hippocampus ( $p = 0.004$ ) and the cortex ( $p = 0.002$ ) (Fig. 6c,d). APP expression levels were unchanged in both regions (Fig. 6e), whereas a significant loss of PS1 expression was observed (Fig. 6f), concurring with the results from single-treatment male mice (Fig. 4h). To explore the robustness of these effects, a further group of female mice treated with a lower dose of MK-801 (0.2 mg/kg) for 6 weeks was studied. Analysis of tau phosphorylation in the cerebral cortex (Fig. 7) indicated significantly increased levels of all three investigated epitopes, AT8 ( $p = 0.002$ ), S404 ( $p = 0.004$ ) and S396 ( $p = 0.009$ ).

The notable difference of male and female mice in this study parallels AD epidemiology (Snyder et al., 2016) and may be related to the established, higher sensitivity of females to toxic NMDA receptor inhibition, which has been shown to be critically influenced by gonadal hormone levels (De Olmos et al., 2008). More broadly, these hormones are known to have a strong impact on hippocampal functioning (Spencer et al., 2008). Alternatively, but not mutually exclusive, the weaker habituation in females might be related to the relatively higher brain levels of MK-801 after ip injection (Andine et al., 1999). In summary, the data in Fig. 5-7 indicate that repeated NMDA receptor blockade bears the potential to induce *in vivo*, in both sexes and beyond the acute stage, relevant markers of AD pathology such as cortical AT8 and S404 immunoreactivity (Mondragon-Rodriguez et al., 2014).

## Discussion

### **A chronic NMDA receptor insufficiency model for Alzheimer's disease**

AD displays a distinctive histopathology foremost characterized by neurofibrillary tangles and amyloid plaques (Braak et al., 1994; Roher et al., 2014). Both these features have been viewed to be causal for the disease. We propose that both alterations reflect the culmination of a derailed long-lasting pursuit of postsynaptic neurons to receive sufficient excitatory input as calibrated during early development (Fig. 8). According to this model, excitatory insufficiency is caused by functional inhibition of excitatory neurotransmission in sporadic AD (e.g. due to the presence of ApoE4 protein or anti-NMDA receptor antibodies), and by genetically determined hypogenesis of excitatory structures like fiber tracts in familial AD (see below for references). Both variants would result in the same compensatory, but unfortunately perpetuated response of induced A $\beta$  formation and tau phosphorylation that antecedes plaque and tangle formation.

Functionally, it is inferred that A $\beta$  serves as acute glutamatergic sensitizer (Mattson et al., 1992; Harkany et al., 2000; Puzzo et al., 2008; Garcia-Osta and Alberini, 2009; Morley et al., 2010; Danysz and Parsons, 2012) intended only for short-term use, which is rapidly replaced by other APP cleavage products such as sAPP $\alpha$  to serve as synaptotrophic factors (Moechars et al., 1996; Bell et al., 2008; Nicolas and Hassan, 2014). Tau phosphorylation serves a similar purpose by either facilitating synaptic protein transport (Dixit et al., 2008), sensitizing NMDA receptors (Ittner et al., 2010), or both. Synapse fortification or synaptogenesis (as per sAPP $\alpha$ ) are superior to synaptic sensitization (as per A $\beta$ ) since simple sensitization bears the risk of self-excitation (seizures) and does not increase the signal-to-noise ratio of synaptic transmission, whereas synapse formation genuinely does. Notably, diminished excitatory signal-to-noise ratios appear to be common in AD (Danysz and Parsons, 2012) and may underlie the considerably increased risk of seizures especially in familial forms of the disease (Pandis and Scarneas, 2012). However, synapse formation requires time and coordination, why the interim time is bridged by default with a glutamatergic sensitizer to maintain functional integrity in the short-term. This idea is supported by our findings that A $\beta$  was only transiently elevated after NMDA antagonist treatment, without any induction of BACE1, with only temporary induction of PS1 in the cortex and a late reduction of PS1 expression in the hippocampus (Fig. 4h). A

persistent reduction of PS1 was also seen in female mice after subchronic NMDA antagonist treatment (Fig. 6f), which might functionally recapitulate the inhibitory effects of AD-related PS1 mutations (Shen and Kelleher, 2007; Xia et al., 2015; Sun et al., 2017). In contrast, ADAM10 was robustly upregulated in the cortex 4 h and 24 h after single antagonist injection (Fig. 4h). Similar observations of increased ADAM10, but unchanged BACE and reduced PS1 expression have been made in sporadic AD tissues (Takami et al., 1997; Davidsson et al., 2001; Gatta et al., 2002). Thus, APP processing yields at least two products, A $\beta$  and sAPP $\alpha$ , which shall remedy adverse consequences of neuronal deprivation from excitation. In endocrinology, such complementary regulatory functions of proteolytic fragments coming from the same precursor protein are quite common, as in angiotensinogen (Santos et al., 2013) or proopiomelanocortin (O'Donohue and Dorsa, 1982).

The “compensatory response” model of AD provides an explanation why many genetic and sporadic triggers of AD either disrupt the development of glutamatergic connections during infancy (e.g. PS1 and APP mutations) or adult glutamatergic signaling (e.g. ApoE4 alleles, repeated mechanical injuries), as discussed in the following.

### **Explanatory scope of the proposed model**

**I. AD occurs in hereditary and sporadic forms.** A small fraction of AD cases are caused by hereditary mutations in APP, PS1 and PS2, or by gene duplications in the region of the APP gene. Traditionally, these genetic alterations have been viewed to be associated with persistently elevated levels of A $\beta$  or particularly toxic subspecies thereof (Hardy and Selkoe, 2002). Such cases may be easily accommodated into the excitatory insufficiency model by considering brain development as follows. Glutamatergic tone is very strictly regulated during neuronal development (Spitzer, 2006) since hypoactivity of the glutamatergic system leads to immediate neuronal death (Ikonomidou et al., 1999), whereas hyperactivity might lead to convulsions, epilepsy and other life-threatening sequelae (Chapman, 1998; Coulter and Eid, 2013). Thus, elevated levels of the glutamatergic sensitizer A $\beta$  during infancy will induce a compensatory, irreversible decrease in the baseline structural components of excitatory neurotransmission, such as the number of axons in excitatory fiber tracts or the number of neurons. These reduced structures will be affected much earlier by any

form of subtle, adult or age-related excitatory insufficiency as they are (i) fewer and (ii) already run at a high rate of A $\beta$  production to maintain baseline neurotransmission. Hence, the early and regular pathology in the hereditary forms of AD could in fact be attributable to developmental excitatory insufficiency on a structural level.

This notion is supported by an extensive body of evidence. For instance, temporally limited induction of A $\beta$  production during early postnatal development (in on/off APP<sup>swe</sup>/ind mice) has been shown to result in permanent locomotor hyperactivity in adult animals (Rodgers et al., 2012), which is a typical phenotype of NMDA antagonist exposure (Andine et al., 1999). Significantly reduced numbers of presynaptic terminals and neurons have been counted in the hippocampus of young, 2-3 month-old APP<sup>ind</sup> mice (Hsia et al., 1999), together with a shortened corpus callosum and a smaller dentate gyrus by 100 days of age (Redwine et al., 2003). Reduced spine density in this region high in NMDA receptors has also been observed in young adult, 4 month-old APP<sup>swe</sup> mice (Jacobsen et al., 2006). In humans, heterozygote ApoE4 carriers have been described to exhibit entorhinal cortex thinning (Shaw et al., 2007) and grid cell dysfunction (Kunz et al., 2015) as soon as in their early 20s, long before their increased risk of entorhinal pathology and AD precipitates. Grid cells are selectively dependent on NMDA receptors for firing (Gil et al., 2018). Brain structural and functional abnormalities have also been reported for young adult carriers of autosomal-dominant PS1 mutations (Reiman et al., 2012), including the need for hippocampal metabolic hyperactivation to achieve the same results as non-carriers in a learning task (Quiroz et al., 2010). Furthermore, unbalanced inhibitory activity resulting from neurodevelopmental defects appears to be a central component of Down syndrome (Ferrer and Gullotta, 1990; Belichenko et al., 2004; Fernandez et al., 2007), which later in life is characterized by a greatly increased risk of AD (Wiseman et al., 2015). Finally, several other proteins involved in neuronal development have emerged from sporadic AD GWAS studies, such as MEF2C, EPHA1, and SLC24A4 (Lambert et al., 2013; Rosenthal et al., 2014). Thus, carriers of AD mutations or risk alleles appear to be anatomically different and hypo-excitatory (with metabolic and A $\beta$  compensation) already during brain development.

Less traditionally, the idea has emerged that mutations in PS1, underlying the vast majority of familial AD cases, may not result in any systematically elevated or uniformly shifted production of A $\beta$  species (Sun et al., 2017), but may rather evoke immediate neurodevelopmental defects and excitatory network failure via a PS1 loss of function (Shen and Kelleher, 2007; Xia et al., 2015). Notably, these developmental defects compromise functions that critically depend on glutamatergic integrity such as LTP (Xia et al., 2015). Comparable observations of early impaired LTP have been made in mutant APP transgenic mice (Hsia et al., 1999; Moechars et al., 1999; Jacobsen et al., 2006). Moreover, an explicit NMDA receptor deficit has been described for PS1/2 knockout mice (Saura et al., 2004). Hence, under the premises of the “less traditional” interpretation, familial AD would immediately fit into an NMDA receptor insufficiency model of AD causation.

**II. Amyloid and tau pathology are common in many CNS disorders beyond AD.** Amyloid plaques as well as neurofibrillary tangles are widespread and occur isolated or in combination in many different nosological entities, such as frontotemporal dementia (Gordon et al., 2016), cerebral amyloid angiopathy (Revesz et al., 2002) or Down syndrome (Wiseman et al., 2015). In addition, clinically diagnosed AD patients are not infrequently “amyloid negative” (Monsell et al., 2015; Landau et al., 2016), while cognitively normal patients can harbor extensive amyloid pathology (Elobeid et al., 2014). Consequently, it appears that both lesions are rather general phenomena in the brain that occur in association with rather diverse problems of the brain. General occurrence of a specific molecular phenotype is yet much better reconcilable with a “compensatory response” model than a “disease cause” model, as outlined on the following two examples.

(i) Acute CNS lesions. Induction of APP has long been known to constitute a rapid and persistent response of the cortex to deficient subcortical innervation (Wallace et al., 1993). Notably, this effect was seen after inhibition of cholinergic as well as adrenergic and serotonergic pathways in rats (through chemical lesions in the nucleus basalis of Meynert, the ascending noradrenergic bundle and the dorsal raphe nucleus, respectively). Formation of A $\beta$  as one consequence of such APP induction has been widely confirmed in experimental traumatic brain injury (Bird et al., 2016). Related findings have been made in humans, where APP has been

used as early marker of axonal damage after mechanical trauma (Sherriff et al., 1994). Severe neurotrauma patients within hours can develop diffuse amyloid plaques (Ikonomovic et al., 2004) whose long-term persistence is likely (Scott et al., 2016). By correlation, higher early A $\beta$  levels have been found to predict better clinical outcome after severe neurotrauma (Magnoni et al., 2012). More subtle and specific inhibition of axonal transport by kinesin reduction has also been shown to enhance A $\beta$  production in APP<sup>sw</sup> mice (Stokin et al., 2005), whereas the inhibition of the A $\beta$  response was associated with poorer recovery after spinal cord injury in wild-type mice (Pajooresh-Ganji et al., 2014). Readily applicable to all these cases is the idea that APP expression and A $\beta$  formation occurred as compensatory response to the lesional excitatory interruption and were directed at a provisional functional maintenance of the lesioned site, leading the way for its later repair.

(ii) Down syndrome (DS). DS (or trisomy 21) is strongly associated with dementia and AD-like pathology at a relatively early age (Wiseman et al., 2015). It has been proposed that the increased gene dose of APP (which is encoded on chromosome 21) might be causative to this observation, by directly leading to an increased production of APP and A $\beta$  (Rumble et al., 1989). However, a consistent induction of APP over ages and cell types does not occur in DS, calling for specific regulatory mechanisms to induce pathological amyloid formation (Antonarakis, 2017). In addition, overexpression of wild-type APP alone is not related to neurodegeneration or plaque pathology in mice (Elder et al., 2010). Hence, it is more plausible to conclude that excitatory network failure of neurodevelopmental origin in DS causes a persistent compensatory elevation of the glutamatergic sensitizer A $\beta$ , resulting in untimely amyloid pathology. In fact, DS has been associated with selectively suppressed excitatory (Belichenko et al., 2004; Kurt et al., 2000) and excessive inhibitory activity (Fernandez et al., 2007) as well as an increased risk of seizures due to an exaggerated amplification of small excitatory signals in an overly inhibitory background (Araujo et al., 2015).

### **III. ApoE polymorphisms are predominant risk factors for sporadic AD.**

The strong association of ApoE4 with sporadic AD (Rosenthal and Kamboh, 2014; Deming et al., 2017) first reported in 1993 (Strittmatter et al., 1993) has entailed numerous, often contradictory hypotheses on the biochemical origin of this

association, ranging from cholesterol transport to A $\beta$  clearance (Liu et al., 2013). Still, there is one mechanism that may be viewed to stand out simply for its effect size and its localization to the synapse, the prime site of AD (Terry et al., 1991). After binding to its postsynaptic receptor ApoER2, ApoE is internalized, followed by eventual dissociation and recycling of ApoER2 to the surface. Notably, ApoE4 remains internalized much longer than other isoforms (Heeren et al., 2004), leading to impaired surface recycling of ApoER2 and co-endocytosed NMDA receptors (Chen et al., 2010). In practice, ApoE4 has been shown to reduce neuronal NMDA receptor surface density by a factor of 3-5 compared to ApoE3 and ApoE2 under relevant in vitro conditions (Chen et al., 2010). Furthermore, ApoER2 is a canonical receptor for reelin, a pivotal synaptotrophic effector (Tissir and Goffinet, 2003) and activator of NMDA receptors via Src kinase-mediated phosphorylation (Beffert et al., 2005). After competitive ligation of ApoER2 with ApoE4, but not with ApoE3 or ApoE2, reelin's capacity to enhance long-term potentiation was virtually abolished (Chen et al., 2010). Therefore, ApoE4 is a specific and severe NMDA receptor functional suppressor at the postsynaptic membrane. Accordingly, undue amplification of weak excitatory signals has been reported for ApoE4 knock-in mice (Nuriel et al., 2017). This compensatory phenotype is likely related to the substantially elevated A $\beta$  levels shared by ApoE4 knock-in mice (Liraz et al., 2013), ApoE4/APPind mice (Bales et al., 2009) and human ApoE4 carriers (Monsell et al., 2015).

#### **IV. Association of AD with sex, sleep, and auditory performance.**

Epidemiology and clinic have yielded a variety of apparently unrelated associations of AD with specific predictive factors. We find that many of these become plausible after introducing NMDA receptor insufficiency as disease trigger. We briefly discuss three of them below.

(i) Sex. Amyloid pathology in humans begins at about 50 years of age for both sexes, but progresses significantly faster in females (Braak et al., 2011). This meshes with the fact that NMDA receptor density and function in the hippocampus are strongly augmented by estrogen (Wooley et al., 1997; Spencer et al., 2008), which drops in females after the age of 50 years. Aggravated NMDA receptor insufficiency due to estrogen loss would thus require a more pronounced compensatory amyloid response in females. In fact, an inverse correlation of

amyloid formation and estrogen levels in AD animal models and human patients has been noted (Li et al., 2014).

(ii) Sleep. Recent evidence from a series of knock-out mice indicates that Ca<sup>2+</sup>-dependent hyperpolarization, which is strongly dependent on NMDA receptors, critically regulates sleep duration (Tatsuki et al., 2016). Correspondingly, sleep duration in animals was impaired by pharmacological NMDA receptor blockade (Tatsuki et al., 2016). Sleep disturbances, especially fragmented sleep, are recurrently seen in early AD (Bubu et al., 2017), which might thus reflect emerging NMDA receptor insufficiency.

(iii) Auditory performance. Impaired hearing is one of the most significant correlates of dementia (Livingston et al., 2017) and very frequent in DS (Kreicher et al., 2018). Even if auditory functioning depends on various systems, it is noteworthy that subtle calcium dysregulation as per NMDA receptor inhibition seems to be predestined to cause auditory malfunction. For instance, the cochlea, the colliculus and the auditory cortex all express functional NMDA receptors that have been shown to be indispensable for auditory space map formation (Schnupp et al., 1995) and audiosensory processing (Bickel et al., 2008), but also for the development of noise-induced hearing loss (Sanchez et al., 2015). Moreover, hearing loss is the prime phenotype of mice with mutant PMCAs (Bortolozzi and Mammano, 2018), which are calcium pumps that in close cooperation with NMDA receptors determine the shape of neuronal calcium transients (Scheuss et al., 2006). In fact, deficient auditory plasticity has been shown to be amenable to treatment with NMDA agonists in the clinic (Kantrowitz et al., 2016).

### **What might be the source of NMDA receptor insufficiency in sporadic Alzheimer's disease?**

(i) Autoimmune antibodies. Anti-NMDA receptor autoantibodies are frequent (seroprevalence 10-20%, rising with age) (Zerche et al., 2015), act anti-excitatory in vitro (Pruss et al., 2012; Castillo-Gomez et al., 2016) and appear to be broadly associated with cognitive deficits and dementia (Pruss et al., 2012; Doss et al., 2014; Finke et al., 2017). Notably, their association with outcome in clinical stroke depends on the ApoE genotype (Zerche et al., 2015). Other autoantibodies against excitatory neurotransmitter receptors exist (Borroni et al., 2017). A role of autoantibodies in AD could be reconcilable with the recurrent appearance of



microglial immune-response genes in AD GWAS studies (Sims et al., 2017), as microglia are the predominant antigen-presenting cells in the CNS (Aloisi et al., 2000).

(ii) Excitatory network failure. Beyond genetic reasons as in DS or in ApoE4 carriers, acquired and persistent excitatory insufficiency may result from many presumed AD risk factors such as mechanical lesions (Li et al., 2017), periodic hemorrhages (Revesz et al., 2002; Cordonnier and van der Flier, 2011), or neurotropic viral infections (Itzhaki et al., 2016). Such events could also induce autoantibody formation as a secondary effect.

In summary, we have shown here that pharmacological blockade of NMDA receptors under physiological and non-transgenic conditions elicits a rapid regulatory response in terms of a tissue-specific induction of APP expression, A $\beta$  formation and APP secretase modulation (Fig. 4) as well as tau phosphorylation (Fig. 3) in vivo. Very similar effects were seen under fully defined conditions of cortical cell culture in vitro (Fig. 1 and 2). Especially female mice were unable to biochemically habituate to repeated injections of the employed NMDA receptor blocker, indicating the pathogenic potential of long-term NMDA receptor insufficiency (Fig. 5-7). The derived hypothesis that persistent NMDA receptor insufficiency was the mechanistic cause of AD might open viable new means of prevention, i.e. the removal of circulating autoantibodies or the positive modulation of glutamatergic neurotransmission. Approved or repurposable drugs for both indications exist. These new approaches might complement more conventional measures such as the avoidance of brain injury or the continued stimulation of the brain through sensory, cognitive and motor challenges (Barnes and Yaffe, 2011), whose probable efficacy might also rely on ameliorated connectivity via NMDA receptors.

### **Acknowledgements**

We thank Roland Rabl, Annamaria Molnar, Martina Farcher, Manuela Prokesch, Petra Baumgartner, Stefanie Flunkert, Klaus Lorenzoni, and Birgit Hutter-Paier, all affiliated with QPS Austria, for their excellent management and professional realization of the animal studies. The funding of this work by the Volkswagen-Stiftung (Grants #87736, #89854 and #93286) is gratefully acknowledged.

### **Author contributions**

Both authors designed the experiments, the first author performed the experiments, both authors analyzed the data and wrote the paper.

### **Declaration of interests**

Both authors declare they have no conflicts of interest.

## Figure legends

### Figure 1. Tau phosphorylation in rat cortical neurons.

**(a)** Effect of NMDA (5  $\mu$ M), glutamate (Glu, 5  $\mu$ M) and AP5 (100  $\mu$ M) treatment on epitope-specific tau phosphorylation at the AT8, S404 and S396 sites in rat cortical neurons maintained under low (2.5 mM) and high (27.5 mM) K<sup>+</sup> conditions for 4 h. The Tau-1 antibody recognizes unphosphorylated total tau; tubulin (Tub) was used as loading control. Tub control blots always refer to the 1-2 blots directly above.

**(b)** Quantification of n = 3 independent Western blot experiments performed as in (a). After individual normalization to Tub, signal intensities of each blot were related to accordingly normalized total tau. Statistical evaluations were done by Two-way ANOVA with factor #1 being agonist exposure (NMDA or Glu) and factor #2 being antagonist (AP5) exposure. Here and throughout this work, displayed significance levels result from pairwise post-hoc tests executed only in case of ANOVA significance ( $p_x < 0.05$ ); further details are provided in the Supplemental information. ANOVA significance levels were: Anti-AT8 (low K<sup>+</sup>:  $p_1 = 0.246$ ,  $p_2 < 0.001$ , n = 3; high K<sup>+</sup>:  $p_1 = 0.473$ ,  $p_2 = 0.024$ , n = 3), anti-S404 (low K<sup>+</sup>:  $p_1 = 0.241$ ,  $p_2 = 0.004$ , n = 3; high K<sup>+</sup>:  $p_1 = 0.322$ ,  $p_2 < 0.001$ , n = 3) and anti-S396 (low K<sup>+</sup>:  $p_1 = 0.625$ ,  $p_2 = 0.017$ , n = 3; high K<sup>+</sup>:  $p_1 = 0.735$ ,  $p_2 = 0.017$ , n = 3).

**(c)** Combined statistical analysis of tau phosphorylation under low and high K<sup>+</sup> conditions. Anti-AT8:  $p_1 = 0.122$ ,  $p_2 < 0.001$ , n = 6; anti-S404:  $p_1 = 0.148$ ,  $p_2 < 0.001$ , n = 6; anti-S396:  $p_1 = 0.399$ ,  $p_2 < 0.001$ , n = 6.

**(d)** Phase-contrast images of cortical neurons treated with 5  $\mu$ M NMDA or 100  $\mu$ M AP5 under low and high K<sup>+</sup> conditions for 4 h as in the above experiments.

**(e)** Assessment of neuronal survival by counting MAP-2 positive cells. Cultures treated as in (a)-(d) were stained for neuron-specific MAP-2 immunoreactivity, photographed and examined quantitatively. For each biological replicate (n), neuron counts from three different pictures were added and normalized to the total number of plated cells in the same areas as per DAPI staining. Low K<sup>+</sup>:  $p_1 = 0.110$ ,  $p_2 = 0.039$ , n = 4; high K<sup>+</sup>:  $p_1 = 0.075$ ,  $p_2 = 0.659$ , n = 4.

**(f)** Assessment of metabolic activity in corresponding cultures by MTT reduction. Each biological replicate (n) was derived from 5 replicates on the same multi-well plate. Low K<sup>+</sup>:  $p_1 = 0.042$ ,  $p_2 = 0.067$ , n = 4; high K<sup>+</sup>:  $p_1 = 0.009$ ,  $p_2 = 0.063$ , n = 4.

## **Figure 2. APP expression and processing in rat cortical neurons.**

**(a)** Effect of NMDA (5  $\mu$ M), glutamate (Glu, 5  $\mu$ M) and AP5 (100  $\mu$ M) on APP expression in rat cortical neurons maintained under low (2.5 mM) and high (27.5 mM) K<sup>+</sup> conditions for 4 h. The antibody recognizes the first 10 amino acids of the A $\beta$  sequence.

**(b)** Quantification of n = 3 independent Western blots performed as in (a) under low and high K<sup>+</sup> conditions. Statistical evaluation was done by Two-way ANOVA as in Fig. 1b; significance levels indicated in the graph result from post-hoc tests. Low K<sup>+</sup>: p<sub>1</sub> = 0.209, p<sub>2</sub> < 0.001, n = 3; high K<sup>+</sup>: p<sub>1</sub> = 0.988, p<sub>2</sub> < 0.001, n = 3.

**(c)** Combined analysis for both cultivation conditions: p<sub>1</sub> = 0.270, p<sub>2</sub> < 0.001, p<sub>interaction</sub> = 0.034, n = 6.

**(d)** Soluble A $\beta$ <sub>40</sub> and A $\beta$ <sub>42</sub> levels in the supernatant of cell cultures treated as above were analyzed by ELISA. Depicted is the combined analysis of the low and high K<sup>+</sup> cultures. A $\beta$ <sub>40</sub>: p<sub>1</sub> = 0.100, p<sub>2</sub> = 0.003, n = 6; A $\beta$ <sub>42</sub>: p<sub>1</sub> = 0.784, p<sub>2</sub> = 0.925, n = 6.

## **Figure 3. Tau phosphorylation in MK-801 treated mice.**

Male mice treated with MK-801 (1.0 mg/kg ip) were analyzed after 4 h and 24 h for specific tau phosphorylation. The control group was exposed to saline for 4 h. Different brain regions were stereotactically dissected as described in the Methods. Expression levels were normalized blot-wise to Tub and afterwards related to total tau expression as in Fig. 1. The three groups (n = 5) were evaluated by One-way ANOVA; the depicted significance levels result from pairwise post-hoc tests versus the control.

**(a,b)** Hippocampus. Anti-AT8: p = 0.163; anti-S404: p = 0.022; anti-S396: p = 0.574.

**(c,d)** Cortex. Anti-AT8: p = 0.003; anti-S404: p = 0.016; anti-S396: p = 0.134.

**(e)** Thalamus. Anti-AT8: p = 0.935; anti-S404: p = 0.353; anti-S396: p = 0.126.

## **Figure 4. APP expression and processing in MK-801 treated mice.**

**(a-c)** APP immunoblots of three different brain regions from MK-801 treated mice.

**(d)** Quantification of APP expression. Statistical analysis was done by One-way ANOVA as in Fig. 3. Hippocampus: p = 0.001, n = 5; cortex: p = 0.007, n = 5; thalamus: p = 0.041, n = 5.

**(e)** Soluble SDS-tissue concentrations of A $\beta$ <sub>40</sub> (pg/mg protein) after 4 h and 24 h MK-801 treatment were determined by ELISA in the following brain regions:

hippocampus (Hc):  $p = 0.029$ ; cortex (Ctx):  $p = 0.136$ ; thalamus (Th):  $p = 0.111$ ; entorhinal cortex (Ent):  $p = 0.597$ ; retrosplenial cortex (Rsp):  $p = 0.016$ ; caudate/putamen (CPu):  $p = 0.149$  by One-way ANOVA. In this assay, a control group of  $n = 7$  animals was analyzed; treatment groups were  $n = 5$  animals as in (a)-(d). The 24 h CPu tissue was not analyzed.

**(f)** Concentrations of  $A\beta_{42}$  (pg/mg protein) in the same tissues as in (e). Hippocampus:  $p = 0.010$ ; cortex:  $p = 0.034$ ; thalamus:  $p < 0.001$ ; entorhinal cortex:  $p = 0.266$ ; retrosplenial cortex:  $p = 0.966$ ; caudate/putamen:  $p = 0.135$  by One-way ANOVA.

**(g)** Total  $A\beta$  concentrations (pg/mg protein) calculated per mouse from the above  $A\beta_{40}$  and  $A\beta_{42}$  contents. Hippocampus:  $p = 0.015$ ; cortex:  $p = 0.340$ ; thalamus:  $p = 0.014$ ; entorhinal cortex:  $p = 0.661$ ; retrosplenial cortex:  $p = 0.019$ ; caudate/putamen:  $p = 0.044$ .

**(h)** Effect of MK-801 treatment on the expression of different secretases involved in APP processing as determined by Western blotting. ANOVA significance levels were: ADAM10 (hippocampus:  $p = 0.114$ ; cortex:  $p = 0.026$ ; thalamus:  $p = 0.043$ ), BACE1 (hippocampus:  $p = 0.722$ ; cortex:  $p = 0.171$ ; thalamus:  $p = 0.218$ ), PS1 (hippocampus:  $p = 0.023$ ; cortex:  $p = 0.010$ ; thalamus:  $p = 0.671$ ). Statistical evaluations were done on  $n = 5$  animals as in (d). The numbers in the graph represent pairwise significances from post-hoc tests. Actin was used as loading control on BACE1 blots.

### **Figure 5. Effect of repeated, 12-week MK-801 treatment in male mice.**

Male mice were treated with MK-801 (1.0 mg/kg ip) three times per week (Mon, Wed, Fri) for 12 weeks (36 injections altogether). Tissue sampling was performed 24 h after the last treatment, analyzing the hippocampus and the total cortex (compare the Methods) for tau phosphorylation and APP expression. Statistical evaluations were done by One-way ANOVA.

**(a)** Hippocampus immunoblots analyzing saline-treated control animals ( $n = 7$ ) and the treatment group ( $n = 7$ ) for specific tau phosphorylation.

**(b)** Quantified hippocampal expression levels detected with antibodies anti-AT8:  $p = 0.335$ , anti-S404:  $p = 0.554$ , anti-S396:  $p = 0.996$ . Signals were Tub-normalized and related to total tau expression.

**(c)** The same analysis as in (a) done for the cortex.

**(d)** Quantified expression levels in the cortex. Anti-AT8:  $p = 0.039$ ; anti-S404:  $p = 0.011$ ; anti-S396:  $p = 0.819$ .

**(e)** Quantification of APP expression after repeated MK-801 treatment ( $n = 7$  animals per group). Hippocampus:  $p = 0.362$ ; cortex:  $p = 0.039$ .

**Figure 6. Effect of repeated MK-801 treatment in female mice.**

Female mice were treated with MK-801 (1.0 mg/kg ip) three times per week for 6 weeks (18 injections). Tissue sampling was performed 24 h after the last treatment.

**(a)** Hippocampus immunoblots analyzing tau phosphorylation.

**(b)** Quantified hippocampal phospho-tau expression detected with antibodies anti-AT8:  $p = 0.004$ , anti-S404:  $p = 0.004$ , anti-S396:  $p = 0.201$ .

**(c)** The same analysis as in (a) done for the cortex.

**(d)** Quantified expression levels in the cortex. Anti-AT8:  $p = 0.216$ ; anti-S404:  $p = 0.002$ ; anti-S396:  $p = 0.252$ .

**(e)** Quantification of APP expression ( $n = 7$  animals per group). Hippocampus:  $p = 0.176$ ; cortex:  $p = 0.418$ .

**(f)** Expression of APP-processing secretases. ANOVA significance levels were: ADAM10 (hippocampus:  $p = 0.949$ ; cortex:  $p = 0.196$ ), BACE1 (hippocampus:  $p = 0.434$ ; cortex:  $p = 0.552$ ), PS1 (hippocampus:  $p = 0.030$ ; cortex:  $p = 0.018$ ). Statistical evaluations were done on  $n = 7$  animals as in (e). Actin was used as loading control for BACE1.

**Figure 7. Effect of repeated low-dose MK-801 treatment in female mice.**

Female mice were treated with low-dose (LD) MK-801 (0.2 mg/kg ip) three times per week for 6 weeks as in the normal-dose experiments in Fig. 6. Tissue sampling was performed 24 h after the last treatment.

**(a)** Cortical samples from control animals ( $n = 7$ ) and the treatment group ( $n = 7$ ) were assayed for specific tau phosphorylation.

**(b)** Quantification of tau phosphorylation as detected with antibodies anti-AT8:  $p = 0.002$ , anti-S404:  $p = 0.004$ , anti-S396:  $p = 0.009$ . Signals were Tub-normalized and afterwards related to total tau expression.

### **Figure 8. Proposed model for the etiology of AD.**

According to this model, the common pathogenetic mechanism of AD is insufficient excitatory neurotransmission via NMDA receptors. The insufficiency is caused by genetically determined, anatomically manifest hypogenesis of excitatory structures in familial AD and trisomy 21-related AD, by intracellular trapping of synaptic NMDA receptors in ApoE4-related AD, and by NMDA antagonistic effectors (traumata, autoantibodies) in sporadic AD. In all cases, a regulatory response of initially elevated APP expression, A $\beta$  formation and tau phosphorylation is induced by the insufficiency, as shown in this study using pharmacological NMDA antagonists. The evoked effects are directed at the interim stabilization and permanent resurrection of excitatory neurotransmission after temporary lesions, as referenced in the Discussion. Since none of the induced response molecules are capable of annihilating sources of chronic NMDA receptor insufficiency (e.g. none can remove autoantibodies), the triggered regulatory responses become chronic and dysregulated themselves, resulting in tau hyperphosphorylation and aberrantly elevated A $\beta$  levels. In the end, both molecules aggregate and form visible lesions.

## Methods

### Primary cortical cell culture

Primary cortical neurons were prepared from E17 Sprague-Dawley rats (Janvier Labs, Le Genest-Saint-Isle, France). The dams were anesthetized with isofluran and killed by guillotine before the progeny was removed. Embryos were decapitated, and cortices were prepared under a binocular microscope. Loosely chopped tissue pieces were then incubated in PBS containing 0.1% trypsin and 0.2% EDTA for 20 min at 37°C. To stop the trypsination, the tissue was transferred to Ca<sup>2+</sup>- and Mg<sup>2+</sup>-free HBSS supplemented with 10% FCS and carefully resuspended. After filtration through a sterilized 50 µm nylon gauze to remove undissociated tissue pieces, the cells were centrifuged at 1,200 g for 4 min at 22°C. The obtained pellet was resuspended in serum-free Neurobasal Medium supplemented with 1x B-27 supplement, 2 mM GlutaMAX and 25 µg/ml gentamicin. All buffers, media and supplements were from Thermo Fisher Scientific, Rockford, IL, USA. An aliquot of the cell suspension was mixed 1:1 with trypan blue solution (Sigma-Aldrich, St. Louis, MO, USA) before visually counting the intact cells in a hemocytometer. The cells were then seeded at a density of 80,000 cells/cm<sup>2</sup> in 6-well, 24-well or 96-well plates (TPP, Trasadingen, Switzerland) that had been pre-coated for 30 min at RT with 0.1 mg/ml poly-L-ornithine (MW range 30 - 70 kDa, from Sigma-Aldrich). Cells were cultivated in the original, supplemented Neurobasal Medium in a humidified cell culture incubator under 5% CO<sub>2</sub> at 37°C for 14 to 17 days.

For the experiments, the cultivation medium was replaced by fully defined physiological Ringer solution (125 mM NaCl, 2.5 mM KCl, 1.25 mM NaH<sub>2</sub>PO<sub>4</sub>, 25 mM D-Glucose, 25 mM NaHCO<sub>3</sub>, ultra-pure water) that had been pre-incubated in a cell culture incubator for 24 h to attain a pH of 7.4. Immediately afterwards, 2 mM CaCl<sub>2</sub> was added manually to each well. Half of the subsequent experiments were done at baseline KCl concentrations of 2.5 mM (denoted “low” K<sup>+</sup>), the other half was done at higher and depolarizing KCl concentrations of 27.5 mM (denoted “high” K<sup>+</sup>) attained by adding 25 mM KCl to the respective cultures. Chemicals for the physiological Ringer solution were obtained at the highest available purity from Carl Roth, Karlsruhe, Germany. The cells were then treated with either of the following agents: 100 µM D-AP5, a highly specific NMDA receptor antagonist (Biotrend, Köln, Germany, or Cayman Chemical, Ann Arbor, MI, USA), 5 µM N-methyl-D-aspartate (NMDA) (Biotrend or Sigma-Aldrich), 5 µM L-glutamate (Sigma-Aldrich), or combinations thereof. All compounds had been dissolved as 100x stocks in ultra-pure water followed by sterile filtration. After addition of the compounds, the plates were incubated for 4 h before the incubation Ringer solution was removed and the cells were collected in lysis buffer (100 mM Tris, 20% sucrose, 0.5% SDS, pH 7.4 with HCl) supplemented with 1x protease inhibitor cocktail (P8340 from Sigma-Aldrich) and 1x phosphatase inhibitor cocktail (PhosSTOP from Roche, Mannheim, Germany). After brief sonication, the protein concentration of the samples was determined colorimetrically using bicinchoninic acid-copper (BCA Protein Assay Kit from Thermo Fisher Scientific). Samples were stored at -25°C.

### Cell survival and metabolic activity assays

Neuronal survival and cellular integrity in cell culture were monitored qualitatively at regular intervals using phase-contrast microscopy. Any cultures showing signs of beginning cellular disintegration, glial proliferation or floating debris were discarded. Quantitative assessment of neuronal survival was achieved by immunostaining of MAP-2-positive cells followed by cell counting (Hajieva et al., 2015). To this end, cells were cultivated on coated glass cover slips in 24-well plates and treated with glutamatergic agonists and antagonists as described before. Thereupon, the Ringer solution was replaced by -80°C methanol, and the cells were fixed for at least 1 h at -80°C. The methanol was removed, and the cells were washed with PBS and blocked for 1 h with 3% FCS in PBS at room temperature. Immediately after blocking, the cells were supplied with the primary antibody (anti-MAP-2, M4403, lot #035M4780V from Sigma-Aldrich, dilution 1:500 in blocking solution) and incubated overnight at 4°C. After three washes with PBS, the secondary antibody (Cy3-conjugated donkey anti-mouse IgG, 715-165-151, lot #123602 from Jackson ImmunoResearch, West Grove, USA, diluted 1:200 in PBS) was applied. After 1 h incubation at room temperature in the dark, the secondary antibody was removed, and the cells were washed again. The nucleic acid dye 4',6-diamidino-2-phenylindole (DAPI, from Sigma-Aldrich) was used as nuclear counterstain to correct for unequal plating and was applied at this stage as 1 µg/ml solution in PBS for 15 min. After three further washes with PBS, fluorescence images of the stained



coverslips were taken. Three different pictures per coverslip from two coverslips per cell culture plate were counted to generate the data for one biological replicate. The added numbers of MAP-2-positive cells were then related to the added numbers of DAPI-positive nuclei, with untreated control cultures serving as 100% reference.

To quantify overall cell viability in terms of metabolic activity, MTT assays were conducted as described (Hajieva et al., 2015). Cells were cultivated in 96-well plates and treated as described before. After 3 h incubation with the agents of interest, the cells were supplied with 0.5 mg/ml MTT (Sigma-Aldrich) under unaltered experimental conditions. After 1 h, the reduction of MTT was stopped by adding 1 volume solubilization solution (40% dimethylformamide, 10% SDS, pH 4.0 with acetic acid). The plates were then incubated for 16-24 h in the dark to lyse the cells and the precipitated formazan crystals, before reading the plate at 560 nm. Results from 5 wells on one plate were averaged and related to the control to generate the data for one biological replicate.

## **Animal studies**

### *Single treatment study*

Male C57BL/6J mice (Janvier Labs) at an age of 10 weeks were intraperitoneally (ip) injected with either saline (n = 7 animals) or 1.0 mg/kg (+)-MK-801 hydrogen maleate (M107, lot #080M4610V from Sigma-Aldrich) dissolved in saline (n = 10 animals). Four hours after the injection, the control group and n = 5 animals of the MK-801 treated animals were killed by cervical dislocation. The other n = 5 MK-801 treated animals were killed 24 h after compound injection by the same method. Whole brains were prepared and rapidly frozen in native state on dry ice before storage at -80°C.

### *Repeated treatment study*

Male and female C57BL/6J mice (Janvier Labs) aged 10 to 12 weeks were repeatedly injected ip with saline or 1.0 mg/kg (+)-MK-801 hydrogen maleate (M107, lot #105M4606V from Sigma-Aldrich) dissolved in saline. An additional low-dose (LD) group of female mice was repeatedly injected ip with 0.2 mg/kg MK-801 in the same manner. The treatments occurred three times per week (Mon, Wed, Fri) at about the same time of day for a period of 6 or 12 weeks as indicated, totaling to a number of r = 18 or r = 36 injections, respectively. Groups sizes were n = 8 saline controls and n = 8 treated animals for 6-week males, n = 8 saline controls and n = 8 treated animals for 12-week males, and n = 8 saline controls, n = 8 treated animals and n = 8 low-dose treated animals for females (all treated for 6 weeks). Animals were sacrificed 24 h after the last injection by cervical dislocation as in the single treatment study. Mouse brains were prepared and snap frozen on dry ice before storage at -80°C.

### *Workflow and sample shipment*

All animal experiments in mice and the preparation of whole brains were done by QPS Austria, Neuropharmacology group (Grambach, Austria). QPS Austria (part of QPS Holdings) is a full-service contract research organization (CRO) providing preclinical and clinical research services. Whole brains were shipped at -80°C from Grambach to Mainz by courier. Further tissue dissection and all analytical procedures were performed at the Institute for Pathobiochemistry of the University of Mainz, Germany.

### *Animal ethics*

The QPS Austria animal facility is fully accredited by the Association for Assessment and Accreditation of Laboratory Animal Care (AAALAC). All procedures in the single treatment study and the repeated treatment study complied with the Animal Care and Welfare Committee. Animals were maintained according to the animal welfare regulations of the Ministry of Science of the Austrian government.

Pertaining to the preparation of neuronal cells from Sprague-Dawley rats at the Mainz facility, all animal procedures were conducted in accordance with German federal law, adhering to the institutional guidelines of the Central Animal Facility of the University of Mainz.

## Brain region-specific tissue preparation

### *Single treatment study*

To separate different brain regions of interest, whole brains were sectioned into slices of 750  $\mu\text{m}$  thickness using a vibratome. Therefore, the frozen brains were fixed on a specimen holder with tissue glue, stabilized with an agarose block and sliced while immersed in ice-cold Ringer solution (125 mM NaCl, 2.5 mM KCl, 1.25 mM  $\text{NaH}_2\text{PO}_4$ , 25 mM D-Glucose, 1 mM  $\text{MgCl}_2$ , 2 mM  $\text{CaCl}_2$ , 25 mM HEPES, pH 7.4 with NaOH, ultra-pure water). The brains were sliced into coronal sections from rostral to caudal. Each slice was transferred to a small cell culture plate placed on ice and filled with ice-cold Ringer solution supplemented with phosphatase inhibitors (2 mM imidazole, 1 mM NaF, 1 mM  $\text{Na}_3\text{VO}_4$ ). The brain regions were sampled from these slices by visually dissecting the appropriate coronal and horizontal Bregma parts under a binocular, following the definitions set forth in the literature (Paxinos and Franklin, 2001). The hippocampus (Hc) and the cortex (Ctx) were collected from coronal Bregma -1.06 to -3.08; the collected region termed "cortex" contained the pooled areas of the somatosensory, visual, auditory and entorhinal cortices and was separated from the regions of the retrosplenial cortex (Rsp) and the entorhinal cortex (Ent), which were sampled independently. The retrosplenial cortex was collected from coronal Bregma -1.06 to -3.08; the entorhinal cortex (encompassing a certain amount of the adjacent piriform cortex, but without the subiculum) was collected from coronal Bregma -2.54 to -5.20. The thalamus (Th) was collected from coronal Bregma -1.06 to -2.70; the regions of the caudate and the putamen (CPu) were dissected from coronal Bregma 1.54 to -0.94. All samples were lysed in sucrose- and SDS-containing buffer (100 mM Tris, 20% sucrose, 0.5% SDS, pH 7.4 with HCl) supplemented with 1x protease and 1x phosphatase inhibitor cocktails (P8340 from Sigma-Aldrich; PhosSTOP from Roche). The sectioned tissues pieces were mechanically homogenized, briefly sonicated and stored at  $-80^\circ\text{C}$  for further analysis.

### *Repeated treatment study*

The frozen brains were carefully cut into two halves at the median sagittal plane. The left hemisphere was used for tissue preparation and was therefore immersed in ice-cold Ringer solution (125 mM NaCl, 2.5 mM KCl, 1.25 mM  $\text{NaH}_2\text{PO}_4$ , 25 mM D-Glucose, 1 mM  $\text{MgCl}_2$ , 2 mM  $\text{CaCl}_2$ , 25 mM HEPES, pH 7.4 with NaOH, ultra-pure water). Using a binocular, the areas of the hippocampus, the cortex, the thalamus and the cerebellum were separated according to their visible anatomical boundaries (Paxinos and Franklin, 2001). The tissues were lysed in 100 mM Tris buffer (pH 7.4 with HCl) containing 1x protease and 1x phosphatase inhibitor cocktails (P8340 from Sigma-Aldrich; PhosSTOP from Roche). The pieces of tissue were gently crushed with a pestle and further homogenized by sonication before being stored at  $-80^\circ\text{C}$ . For the subsequent Western blot analyses, the samples were diluted in sucrose- and SDS-containing buffer (100 mM Tris, 20% sucrose, 0.5% SDS, pH 7.4 with HCl) supplemented with the same protease and phosphatase inhibitor cocktails.

## Immunoblotting

Prior to immunoblotting, the total protein content of all samples was determined by the BCA method using commercial components (Thermo Fisher Scientific). Proteins were separated either by freshly polymerized 10% SDS-polyacrylamide gels or by precast 10-20% Tricine-SDS-polyacrylamide gradient gels (Thermo Fisher Scientific). Gradient gels were exclusively used to separate APP and its cleavage fragments following a published protocol (Rosen et al., 2010), but adopting a different antibody (see below) to detect endogenous mouse and rat APP. For all other purposes, isocratic 10% gels were used. For the SDS-PAGE, samples of 10  $\mu\text{g}$  protein were diluted with 0.25 volumes of 4x sample buffer (200 mM Tris/HCl pH 8.6, 40% glycerol, 20 mM EDTA, 0.08% bromophenol blue, 8% SDS, 20% mercaptoethanol) and boiled for 5 min at  $95^\circ\text{C}$ . After loading the gel, electrophoresis was performed at 120 V for 1.5 h. The separated proteins were immediately transferred to a 0.2  $\mu\text{m}$  nitrocellulose membrane via overnight electroblotting at 30 V. On the next day, the membranes were stained (0.2% Ponceau S in 5% acetic acid), photographed, and subsequently blocked with 2% non-fat dry milk (Carl Roth) in TBST (TBS with 0.05% Tween 20) for 60 min. After three washes with TBST, the membranes were incubated with a primary antibody at  $4^\circ\text{C}$  overnight.

Antibodies were diluted in TBST supplemented with 0.04%  $\text{NaN}_3$  (except for HRP-conjugated antibodies). The following antibodies were used: anti-Actin clone AC-40 (A-4700 from

Sigma-Aldrich, dilution 1:1000); anti-ADAM10 (AB19026, lots #0702052630 and 2776884 from Merck (Darmstadt, Germany), dilution 1:500); anti-APP (ab2072, lots #GR25367-12 and #GR25367-13 from abcam (Cambridge, UK), dilution 1:500); anti-AT8 (MN1020, lots #QE217252 and #SJ2448082 from Thermo Fisher Scientific, dilution 1:200); anti-BACE1 (B0681, lot #076K4780 from Sigma-Aldrich, dilution 1:1000); anti-PS1 (3622, lot #2 from Cell Signaling (Danvers, MA, USA), dilution 1:500); anti-Tau-1 clone PC1C6 (MAB3420, lots #254903 and #2683924 from Merck, dilution 1:500); anti-Tau phospho-S404 (ab92676, lot #GR45351-13 from abcam, dilution 1:1000); anti-Tau phospho-S396 (ab109390, lot #GR189096-9 from abcam, dilution 1:3000); anti- $\alpha$ Tub clone DM1A, HRP-conjugated (ab40742, lots #GR174230-1 and GR314710-1 from abcam, 1:3000). After removal of the primary antibody, the membranes were washed three times with TBST and incubated for 2 h at room temperature with an appropriate HRP-conjugated secondary antibody (from Dianova, Hamburg, Germany) diluted 1:10.000 in TBST. Band detection was done by enhanced chemiluminescence. Solution A (100 mM Tris/HCl (pH 8.6), 0.05% luminol) was freshly mixed with solution B (0.11% p-hydroxycoumaric acid) at a ratio of 10:1 before adding 10% of a concentrated H<sub>2</sub>O<sub>2</sub> stock solution (30% w/v). The membrane was rapidly and consistently coated with the resulting mixture, and the emitted light was recorded with an optical imager. Protein band intensities were quantified using commercial image analysis software (AIDA Image Analyzer from Raytest, Straubenhardt, Germany).

Western blot analyses of cell culture experiments were done on three independent biological replicates (n = 3 cell cultures from three separate litters) for each K<sup>+</sup> condition. The analysis of *Single treatment study*-mice was done on five animals out of each group (n = 5) to fit the employed 15-lane gels. The numerically first 5 animals out of the 7-member saline control group were arbitrarily chosen for analysis and retained throughout all Western blot experiments. For the same reason (15-lane gels), only the first 7 mice out of the 8-membered groups of the *Repeated treatment study* were analyzed when conducting Western blot experiments.

### Amyloid $\beta$ quantification

To determine the amount of A $\beta$ <sub>40</sub> and A $\beta$ <sub>42</sub> in vitro and in vivo, commercial ELISA kits were used (Human/Rat  $\beta$  Amyloid (40) ELISA Kit, 294-62501, lots #WDP2982 and #WDL6357, and Human/Rat  $\beta$  Amyloid (42) ELISA Kit High-Sensitive, 292-64501, lots #WDQ1686 and #WDK0714, both from Wako Pure Chemicals, Osaka, Japan). These ELISAs have been shown to be superior to many other antibody combinations (signal-to-noise ratios >15 when testing for endogenous murine amyloid) and have been certified to be suitable for the detection of endogenous levels of A $\beta$ <sub>40</sub> and A $\beta$ <sub>42</sub> (Teich et al., 2013).

For the measurement of A $\beta$  secretion from cultivated cortical cells, the experimental medium (Ringer solution) after 4 h treatment with glutamatergic agonists and antagonists was collected, supplemented with 1x protease and 1x phosphatase inhibitor cocktails (P8340 from Sigma-Aldrich; PhosSTOP from Roche) and stirred for 10 min at 37°C. Afterwards, the samples were centrifuged at 20,000 g for 10 min at room temperature. The resulting supernatant was used to perform the ELISAs with 100  $\mu$ l per well following the manufacturer's instructions.

The single-treatment in vivo samples that had been lysed in SDS-containing buffer (100 mM Tris, 20% sucrose, 0.5% SDS, pH 7.4 with HCl) were subjected to purification by either of two methods to reduce the amount of free SDS. Method #1 was applied to hippocampal and cortical samples and involved the application of the samples to commercial detergent removal spin columns (87777 from Thermo Fisher Scientific). After adjustment to an equal protein concentration of 2 mg/ml with the original tissue lysis buffer, the samples were centrifuged at 1,500 g for 2 min at room temperature as per the manufacturer's instructions. The obtained, SDS-depleted samples were then diluted to a final working concentration of 1 mg/ml with the "standard diluent" provided as part of each ELISA Kit. Method #2 was applied to cortical samples (for control purposes) as well as to samples from the thalamus, the entorhinal cortex, the retrosplenial cortex and the caudate/putamen. Here, SDS reduction was achieved by precipitation with KCl under conditions that have been shown to yield high peptide recovery (Zhou et al., 2012). Samples were adjusted to a protein concentration of 2 mg/ml with the original lysis buffer before addition of 200 mM KCl from a 2 M stock in ultra-pure water. After 10 min incubation at room temperature, the KDS precipitate was removed by centrifugation at 15,000 g for 10 min. The obtained supernatant was diluted 1:1 with ultra-pure water to obtain the final working concentration of 1 mg/ml protein. ELISAs were then performed as per the manufacturer's instructions. Comparison of the two SDS reduction

protocols was done by inspecting the ELISA results for the cortex, which was analyzed by both protocols. The obtained values for A $\beta$ <sub>40</sub> and A $\beta$ <sub>42</sub> according to both protocols were very similar, such that the results from method #2 were arbitrarily chosen for presentation. In ELISAs with material from the in vivo studies, all n = 7 saline control mice were analyzed.

### **Statistical analysis**

In vitro experiments were statistically evaluated by parametric Two-way ANOVAs. Pertaining to all these Two-way ANOVAs, factor 1 (indexed as subscript<sub>1</sub>) relates to excitatory agonist exposure (NMDA or Glu), and factor 2 (indexed as subscript<sub>2</sub>) relates to excitatory antagonist (AP5) exposure. In vivo studies were evaluated by parametric One-way ANOVAs comparing saline-treated control animals with MK-801 treated animals. To identify pairwise significant differences versus the control after Two-way or One-way ANOVAs, Holm-Sidak's post-hoc test was employed. All significant p values (versus the control at the p = 0.05 level) resulting from these post-hoc tests are provided in the figures. All p values in the main text and the figure legend text represent the corresponding maternal ANOVA significances. The Supplemental information provides a complete list of all maternal ANOVA significances including F values. In cases where the ANOVA normality assumption or equal variance assumption were not met at the p = 0.05 level (normality test failed, n.t.f.; equal variance test failed, e.v.f.), the provided Two-way or One-way ANOVA results are complemented (in the Supplemental information) with the results of One-way ANOVA on Ranks evaluations. All data in this work are shown as mean and standard deviation.

## References

- Abramowski D, et al. Dynamics of Abeta turnover and deposition in different beta-amyloid precursor protein transgenic mouse models following gamma-secretase inhibition. *J. Pharmacol. Exp. Ther.* **327**, 411-424 (2008).
- Aggleton JP, Pralus A, Nelson AJ, Hornberger M. Thalamic pathology and memory loss in early Alzheimer's disease: moving the focus from the medial temporal lobe to Papez circuit. *Brain* **139**, 1877-1890 (2016).
- Allyson J, Dontigny E, Auberson Y, Cyr M, Massicotte G. Blockade of NR2A-containing NMDA receptors induces Tau phosphorylation in rat hippocampal slices. *Neural Plast.* **2010**, 340168 (2010).
- Aloisi F, Ria F, Adorini L. Regulation of T-cell responses by CNS antigen-presenting cells: different roles for microglia and astrocytes. *Immunol. Today* **21**, 141-147 (2000).
- Andine P, Widermark N, Axelsson R, Nyberg G, Olofsson U, Martensson E, Sandberg M. Characterization of MK-801-induced behavior as a putative rat model of psychosis. *J. Pharmacol. Exp. Ther.* **290**, 1393-1408 (1999).
- Antonarakis SE. Down syndrome and the complexity of genome dosage imbalance. *Nat. Rev. Genet.* **18**, 147-163 (2017).
- Araujo BH, Torres LB, Guilhoto LM. Cerebral overinhibition could be the basis for the high prevalence of epilepsy in persons with Down syndrome. *Epilepsy Behav.* **53**, 120-125 (2015).
- Bales KR, Liu F, Wu S, Lin S, Koger D, DeLong C, Hansen JC, Sullivan PM, Paul SM. Human APOE isoform-dependent effects on brain beta-amyloid levels in PDAPP transgenic mice. *J. Neurosci.* **29**, 6771-6779 (2009).
- Barnes DE, Yaffe K. The projected effect of risk factor reduction on Alzheimer's disease prevalence. *Lancet Neurol.* **10**, 819-828 (2011).
- Basha MR, Wei W, Bakheet SA, Benitez N, Siddiqi HK, Ge YW, Lahiri DK, Zawia NH. The fetal basis of amyloidogenesis: exposure to lead and latent overexpression of amyloid precursor protein and beta-amyloid in the aging brain. *J. Neurosci.* **25**, 823-829 (2005).
- Beffert U, et al. Modulation of synaptic plasticity and memory by Reelin involves differential splicing of the lipoprotein receptor Apoer2. *Neuron* **47**, 567-579 (2005).
- Belichenko PV, Masliah E, Kleschevnikov AM, Villar AJ, Epstein CJ, Salehi A, Mobley WC. Synaptic structural abnormalities in the Ts65Dn mouse model of Down Syndrome. *J. Comp. Neurol.* **480**, 281-298 (2004).
- Bell KF, Zheng L, Fahrenholz F, Cuello AC. ADAM-10 over-expression increases cortical synaptogenesis. *Neurobiol. Aging* **29**, 554-565 (2008).
- Bickel S, Lipp HP, Umbricht D. Early auditory sensory processing deficits in mouse mutants with reduced NMDA receptor function. *Neuropsychopharmacology* **33**, 1680-1689 (2008).
- Bird SM, et al. Cerebral amyloid- $\beta$  accumulation and deposition following traumatic brain injury--A narrative review and meta-analysis of animal studies. *Neurosci. Biobehav. Rev.* **64**, 215-228 (2016).
- Borroni B, et al. Anti-AMPA GluA3 antibodies in Frontotemporal dementia: a new molecular target. *Sci. Rep.* **7**, 6723.

- Bortolozzi M, Mammano F. PMCA2 pump mutations and hereditary deafness. *Neurosci. Lett.* **663**:18-24 (2018).
- Braak E, Braak H, Mandelkow EM. A sequence of cytoskeleton changes related to the formation of neurofibrillary tangles and neuropil threads. *Acta Neuropathol.* **87**, 554-567 (1994).
- Braak E, Griffing K, Arai K, Bohl J, Bratzke H, Braak H. Neuropathology of Alzheimer's disease: what is new since A. Alzheimer? *Eur. Arch. Psychiatry. Clin. Neurosci.* **249 Suppl 3**, 14-22 (1999).
- Braak H, Thal DR, Ghebremedhin E, Del Tredici K. Stages of the pathologic process in Alzheimer disease: age categories from 1 to 100 years. *J. Neuropathol. Exp. Neurol.* **70**, 960-969 (2011).
- Bubu OM, et al. Sleep, cognitive impairment, and Alzheimer's disease: A systematic review and meta-analysis. *Sleep* **40**, 32 (2017).
- Bukhari H, Glotzbach A, Kolbe K, Leonhardt G, Loosse C, Müller T. Small things matter: Implications of APP intracellular domain AICD nuclear signaling in the progression and pathogenesis of Alzheimer's disease. *Prog. Neurobiol.* **156**, 189-213 (2017).
- Castillo-Gomez E, et al. All naturally occurring autoantibodies against the NMDA receptor subunit NR1 have pathogenic potential irrespective of epitope and immunoglobulin class. *Mol. Psychiatry* **22**, 1776-1784 (2017).
- Chapman AG. Glutamate receptors in epilepsy. *Prog. Brain Res.* **116**, 371-383 (1998).
- Chen Y, Durakoglugil MS, Xian X, Herz J. ApoE4 reduces glutamate receptor function and synaptic plasticity by selectively impairing ApoE receptor recycling. *Proc. Natl. Acad. Sci. USA* **107**, 12011-12016.
- Cordonnier C, van der Flier WM. Brain microbleeds and Alzheimer's disease: innocent observation or key player? *Brain* **134**, 335-344 (2011).
- Coulter DA, Eid T. Astrocytic regulation of glutamate homeostasis in epilepsy. *Glia* **60**, 1215-1226 (2012).
- Cummings JL, Morstorf T, Zhong K. Alzheimer's disease drug-development pipeline: few candidates, frequent failures. *Alzheimers Res. Ther.* **6**, 37 (2014).
- Danzysz W, Parsons CG. Alzheimer's disease,  $\beta$ -amyloid, glutamate, NMDA receptors and memantine--searching for the connections. *Br. J. Pharmacol.* **167**, 324-352 (2012).
- Davidsson P, Bogdanovic N, Lannfelt L, Blennow K. Reduced expression of amyloid precursor protein, presenilin-1 and rab3a in cortical brain regions in Alzheimer's disease. *Dement. Geriatr. Cogn. Disord.* **12**, 243-250 (2001).
- Deming Y, Li Z, Kapoor M, Harari O, Del-Aguila JL, Black K, Carrell D, Cai Y, Fernandez MV, Budde J, et al., Alzheimer's Disease Neuroimaging Initiative (ADNI); Alzheimer Disease Genetic Consortium (ADGC), Kauwe JS, Goate AM, Cruchaga C. Genome-wide association study identifies four novel loci associated with Alzheimer's endophenotypes and disease modifiers. *Acta Neuropathol.* **133**, 839-856 (2017).
- De Montigny A, Elhiri I, Allyson J, Cyr M, Massicotte G. NMDA reduces Tau phosphorylation in rat hippocampal slices by targeting NR2A receptors, GSK3 $\beta$ , and PKC activities. *Neural Plast.* **2013**, 261593 (2013).

De Olmos S, Bueno A, Bender C, Lorenzo A, de Olmos J. Sex differences and influence of gonadal hormones on MK801-induced neuronal degeneration in the granular retrosplenial cortex of the rat. *Brain Struct. Funct.* **213**, 229-238 (2008).

Dixit R, Ross JL, Goldman YE, Holzbaur EL. Differential regulation of dynein and kinesin motor proteins by tau. *Science* **319**, 1086-1089 (2008).

Doss S, et al. High prevalence of NMDA receptor IgA/IgM antibodies in different dementia types. *Ann. Clin. Transl. Neurol.* **1**, 822-832 (2014).

Elder GA, Gama Sosa MA, De Gasperi R. Transgenic mouse models of Alzheimer's disease. *Mt. Sinai J. Med.* **77**, 69-81 (2010).

Elobeid A, Rantakömi S, Soininen H, Alafuzoff I. Alzheimer's disease-related plaques in nondemented subjects. *Alzheimers Dement.* **10**, 522-529 (2014).

Fernandez F, Morishita W, Zuniga E, Nguyen J, Blank M, Malenka RC, Garner CC. Pharmacotherapy for cognitive impairment in a mouse model of Down syndrome. *Nat. Neurosci.* **10**, 411-413 (2007).

Ferrer I, Gullotta F. Down's syndrome and Alzheimer's disease: dendritic spine counts in the hippocampus. *Acta Neuropathol.* **79**, 680-685 (1990).

Finke C, Bartels F, Lutt A, Pruss H, Harms L. High prevalence of neuronal surface autoantibodies associated with cognitive deficits in cancer patients. *J. Neurol.* **264**, 1968-1977 (2017).

Fleming LM, Johnson GV. Modulation of the phosphorylation state of tau in situ: the roles of calcium and cyclic AMP. *Biochem. J.* **309**, 41-47 (1995).

Garcia-Osta A, Alberini CM. Amyloid beta mediates memory formation. *Learn. Mem.* **16**, 267-272 (2009).

Gatta LB, Albertini A, Ravid R, Finazzi D. Levels of beta-secretase BACE and alpha-secretase ADAM10 mRNAs in Alzheimer hippocampus. *Neuroreport* **13**, 2031-2033 (2002).

Gil M, Ancau M, Schlesiger MI, Neitz A, Allen K, De Marco RJ, Monyer H. Impaired path integration in mice with disrupted grid cell firing. *Nat. Neurosci.* **21**, 81-91 (2018).

Gordon E, Rohrer JD, Fox NC. Advances in neuroimaging in frontotemporal dementia. *J. Neurochem.* **138 Suppl 1**, 193-210 (2016).

Hajieva P, Bayatti N, Granold M, Behl C, Moosmann B. Membrane protein oxidation determines neuronal degeneration. *J. Neurochem.* **133**, 352-367 (2015).

Hardy J, Selkoe DJ. The amyloid hypothesis of Alzheimer's disease: progress and problems on the road to therapeutics. *Science* **297**, 353-356 (2002).

Harkany T, et al. Beta-amyloid neurotoxicity is mediated by a glutamate-triggered excitotoxic cascade in rat nucleus basalis. *Eur. J. Neurosci.* **12**, 2735-2745 (2000).

Heck N, Golbs A, Riedemann T, Sun JJ, Lessmann V, Luhmann HJ. Activity-dependent regulation of neuronal apoptosis in neonatal mouse cerebral cortex. *Cereb. Cortex* **18**, 1335-1349 (2008).

Heeren J, Grewal T, Laatsch A, Becker N, Rinninger F, Rye KA, Beisiegel U. Impaired recycling of apolipoprotein E4 is associated with intracellular cholesterol accumulation. *J. Biol. Chem.* **279**, 55483-55492 (2004).

Herrup K. The case for rejecting the amyloid cascade hypothesis. *Nat. Neurosci.* **18**, 794-799 (2015).

Hoey SE, Williams RJ, Perkinson MS. Synaptic NMDA receptor activation stimulates alpha-secretase amyloid precursor protein processing and inhibits amyloid-beta production. *J. Neurosci.* **29**, 4442-4460 (2009).

Holth JK, Bomben VC, Reed JG, Inoue T, Younkin L, Younkin SG, Pautler RG, Botas J, Noebels JL. Tau loss attenuates neuronal network hyperexcitability in mouse and Drosophila genetic models of epilepsy. *J. Neurosci.* **33**, 1651-1659 (2013).

Hoover BR, et al. Tau mislocalization to dendritic spines mediates synaptic dysfunction independently of neurodegeneration. *Neuron* **68**, 1067-1081 (2010).

Hsia AY, Masliah E, McConlogue L, Yu GQ, Tatsuno G, Hu K, Kholodenko D, Malenka RC, Nicoll RA, Mucke L. Plaque-independent disruption of neural circuits in Alzheimer's disease mouse models. *Proc. Natl. Acad. Sci. USA* **96**, 3228-3233 (1999).

Ikonomidou C, Bosch F, Miksa M, Bittigau P, Vöckler J, Dikranian K, Tenkova TI, Stefovská V, Turski L, Olney JW. Blockade of NMDA receptors and apoptotic neurodegeneration in the developing brain. *Science* **283**, 70-74 (1999).

Ikonomovic MD, Uryu K, Abrahamson EE, Ciallella JR, Trojanowski JQ, Lee VM, Clark RS, Marion DW, Wisniewski SR, DeKosky ST. Alzheimer's pathology in human temporal cortex surgically excised after severe brain injury. *Exp. Neurol.* **190**, 192-203 (2004).

Ittner LM, et al. Dendritic function of tau mediates amyloid-beta toxicity in Alzheimer's disease mouse models. *Cell* **142**, 387-397 (2010).

Itzhaki RF, et al. Microbes and Alzheimer's Disease. *J. Alzheimers Dis.* **51**, 979-984 (2016).

Jacobsen JS, et al. Early-onset behavioral and synaptic deficits in a mouse model of Alzheimer's disease. *Proc. Natl. Acad. Sci. USA* **103**, 5161-5166 (2006).

Kantrowitz JT, et al. Neurophysiological mechanisms of cortical plasticity impairments in schizophrenia and modulation by the NMDA receptor agonist D-serine. *Brain* **139**, 3281-3295 (2016).

Kreicher KL, Weir FW, Nguyen SA, Meyer TA. Characteristics and progression of hearing loss in children with Down syndrome. *J. Pediatr.* **193**, 27-33 (2018).

Kunz L, et al. Reduced grid-cell-like representations in adults at genetic risk for Alzheimer's disease. *Science* **350**, 430-433 (2015).

Kurt MA, Davies DC, Kidd M, Dierssen M, Florez J. Synaptic deficit in the temporal cortex of partial trisomy 16 (Ts65Dn) mice. *Brain Res.* **858**, 191-197 (2000).

Lambert JC, et al. Meta-analysis of 74,046 individuals identifies 11 new susceptibility loci for Alzheimer's disease. *Nat. Genet.* **45**, 1452-1458 (2013).

Landau SM, Horng A, Fero A, Jagust WJ; Alzheimer's Disease Neuroimaging Initiative. Amyloid negativity in patients with clinically diagnosed Alzheimer disease and MCI. *Neurology* **86**, 1377-1385 (2016).

Li R, Cui J, Shen Y. Brain sex matters: estrogen in cognition and Alzheimer's disease. *Mol. Cell. Endocrinol.* **389**, 13-21 (2014).



Li Y, Li Y, Li X, Zhang S, Zhao J, Zhu X, Tian G. Head injury as a risk factor for dementia and Alzheimer's disease: A systematic review and meta-analysis of 32 observational studies. *PLoS One* **12**, e0169650 (2017).

Liraz O, Boehm-Cagan A, Michaelson DM. ApoE4 induces A $\beta$ 42, tau, and neuronal pathology in the hippocampus of young targeted replacement apoE4 mice. *Mol. Neurodegener.* **8**, 16 (2013).

Liu CC, Liu CC, Kanekiyo T, Xu H, Bu G. Apolipoprotein E and Alzheimer disease: risk, mechanisms and therapy. *Nat. Rev. Neurol.* **9**, 106-118 (2013).

Livingston G, et al. Dementia prevention, intervention, and care. *Lancet* **390**, 2673-2734 (2017).

Magnoni S, Esparza TJ, Conte V, Carbonara M, Carrabba G, Holtzman DM, Zipfel GJ, Stocchetti N, Brody DL. Tau elevations in the brain extracellular space correlate with reduced amyloid- $\beta$  levels and predict adverse clinical outcomes after severe traumatic brain injury. *Brain* **135**, 1268-1280 (2012).

Mattson MP, Cheng B, Davis D, Bryant K, Lieberburg I, Rydel RE. beta-Amyloid peptides destabilize calcium homeostasis and render human cortical neurons vulnerable to excitotoxicity. *J. Neurosci.* **12**, 376-389 (1992).

Miyamoto T, Stein L, Thomas R, Djukic B, Taneja P, Knox J, Vossel K, Mucke L. Phosphorylation of tau at Y18, but not tau-fyn binding, is required for tau to modulate NMDA receptor-dependent excitotoxicity in primary neuronal culture. *Mol. Neurodegener.* **12**, 41 (2017).

Moechars D, Lorent K, De Strooper B, Dewachter I, Van Leuven F. Expression in brain of amyloid precursor protein mutated in the alpha-secretase site causes disturbed behavior, neuronal degeneration and premature death in transgenic mice. *EMBO J.* **15**, 1265-1274 (1996).

Moechars D, et al. Early phenotypic changes in transgenic mice that overexpress different mutants of amyloid precursor protein in brain. *J. Biol. Chem.* **274**, 6483-6492 (1999).

Mondragon-Rodriguez S, Perry G, Luna-Munoz J, Acevedo-Aquino MC, Williams S. Phosphorylation of tau protein at sites Ser(396-404) is one of the earliest events in Alzheimer's disease and Down syndrome. *Neuropathol. Appl. Neurobiol.* **40**, 121-135 (2014).

Monsell SE, Kukull WA, Roher AE, Maarouf CL, Serrano G, Beach TG, Caselli RJ, Montine TJ, Reiman EM. Characterizing apolipoprotein E  $\epsilon$ 4 carriers and noncarriers with the clinical diagnosis of mild to moderate Alzheimer dementia and minimal  $\beta$ -amyloid peptide plaques. *JAMA Neurol.* **72**, 1124-1131 (2015).

Morley JE, Farr SA, Banks WA, Johnson SN, Yamada KA, Xu L. A physiological role for amyloid-beta protein: enhancement of learning and memory. *J. Alzheimers Dis.* **19**, 441-449 (2010).

Nestor PJ, Fryer TD, Ikeda M, Hodges JR. Retrosplenial cortex (BA 29/30) hypometabolism in mild cognitive impairment (prodromal Alzheimer's disease). *Eur. J. Neurosci.* **18**, 2663-2667 (2003).

Nicolas M, Hassan BA. Amyloid precursor protein and neural development. *Development* **141**, 2543-2548 (2014).

Nuriel T, et al. Neuronal hyperactivity due to loss of inhibitory tone in APOE4 mice lacking Alzheimer's disease-like pathology. *Nat. Commun.* **8**, 1464 (2017).

O'Donohue TL, Dorsa DM. The opiomelanotropinergic neuronal and endocrine systems. *Peptides* **3**, 353-395 (1982).

- Pajoohesh-Ganji A, Burns MP, Pal-Ghosh S, Tadvalkar G, Hokenbury NG, Stepp MA, Faden AI. Inhibition of amyloid precursor protein secretases reduces recovery after spinal cord injury. *Brain Res.* **1560**, 73-82 (2014).
- Pandis D, Scarmeas N. Seizures in Alzheimer disease: clinical and epidemiological data. *Epilepsy Curr.* **12**, 184-187 (2012).
- Paxinos G, Franklin KB. The Mouse Brain in Stereotaxic Coordinates, 2<sup>nd</sup> ed. Academic Press, San Diego, CA (2001).
- Pruss H, et al. IgA NMDA receptor antibodies are markers of synaptic immunity in slow cognitive impairment. *Neurology* **78**, 1743-1753 (2012).
- Puzzo D, Privitera L, Leznik E, Fa M, Staniszewski A, Palmeri A, Arancio O. Picomolar amyloid-beta positively modulates synaptic plasticity and memory in hippocampus. *J. Neurosci.* **28**, 14537-14545 (2008).
- Quiroz YT, Budson AE, Celone K, Ruiz A, Newmark R, Castrillon G, Lopera F, Stern CE. Hippocampal hyperactivation in presymptomatic familial Alzheimer's disease. *Ann. Neurol.* **68**, 865-875 (2010).
- Redwine JM, Kosofsky B, Jacobs RE, Games D, Reilly JF, Morrison JH, Young WG, Bloom FE. Dentate gyrus volume is reduced before onset of plaque formation in PDAPP mice: a magnetic resonance microscopy and stereologic analysis. *Proc. Natl. Acad. Sci. USA* **100**, 1381-1386 (2003).
- Reiman EM, et al. Brain imaging and fluid biomarker analysis in young adults at genetic risk for autosomal dominant Alzheimer's disease in the presenilin 1 E280A kindred: a case-control study. *Lancet Neurol.* **11**, 1048-1056 (2012).
- Revesz T, Holton JL, Lashley T, Plant G, Rostagno A, Ghiso J, Frangione B. Sporadic and familial cerebral amyloid angiopathies. *Brain Pathol.* **12**, 343-357 (2002).
- Roberson ED, Scarce-Levie K, Palop JJ, Yan F, Cheng IH, Wu T, Gerstein H, Yu GQ, Mucke L. Reducing endogenous tau ameliorates amyloid beta-induced deficits in an Alzheimer's disease mouse model. *Science* **316**, 750-754 (2007).
- Rodgers SP, Born HA, Das P, Jankowsky JL. Transgenic APP expression during postnatal development causes persistent locomotor hyperactivity in the adult. *Mol. Neurodegener.* **7**, 28 (2012).
- Roher AE, Maarouf CL, Kokjohn TA, Belden C, Serrano G, Sabbagh MS, Beach TG. Chemical and neuropathological analyses of an Alzheimer's disease patient treated with solanezumab. *Am. J. Neurodegener. Dis.* **5**, 158-170 (2016).
- Rosen RF, Tomidokoro Y, Ghiso JA, Walker LC. SDS-PAGE/immunoblot detection of A $\beta$  multimers in human cortical tissue homogenates using antigen-epitope retrieval. *J. Vis. Exp.* **38**, 1916 (2010).
- Rosenthal SL, Kamboh MI. Late-Onset Alzheimer's Disease Genes and the Potentially Implicated Pathways. *Curr. Genet. Med. Rep.* **2**, 85-101 (2014).
- Rumble B, Retallack R, Hilbich C, Simms G, Multhaup G, Martins R, Hockey A, Montgomery P, Beyreuther K, Masters CL. Amyloid A4 protein and its precursor in Down's syndrome and Alzheimer's disease. *N. Engl. J. Med.* **320**, 1446-1452 (1989).
- Sanchez JT, Ghelani S, Otto-Meyer S. From development to disease: diverse functions of NMDA-type glutamate receptors in the lower auditory pathway. *Neuroscience* **285**, 248-259 (2015).

Santos RA, Ferreira AJ, Verano-Braga T, Bader M. Angiotensin-converting enzyme 2, angiotensin-(1-7) and Mas: new players of the renin-angiotensin system. *J. Endocrinol.* **216**, R1-R17 (2013).

Saura CA, et al. Loss of presenilin function causes impairments of memory and synaptic plasticity followed by age-dependent neurodegeneration. *Neuron* **42**, 23-36 (2004).

Scheuss V, Yasuda R, Sobczyk A, Svoboda K. Nonlinear [Ca<sup>2+</sup>] signaling in dendrites and spines caused by activity-dependent depression of Ca<sup>2+</sup> extrusion. *J. Neurosci.* **26**, 8183-8194 (2006).

Schnupp JW, King AJ, Smith AL, Thompson ID. NMDA-receptor antagonists disrupt the formation of the auditory space map in the mammalian superior colliculus. *J. Neurosci.* **15**, 1516-1531 (1995).

Schrenk-Siemens K, Perez-Alcala S, Richter J, Lacroix E, Rahuel J, Korte M, Müller U, Barde YA, Bibel M. Embryonic stem cell-derived neurons as a cellular system to study gene function: lack of amyloid precursor proteins APP and APLP2 leads to defective synaptic transmission. *Stem Cells* **26**, 2153-2163 (2008).

Scott G, et al. Amyloid pathology and axonal injury after brain trauma. *Neurology* **86**, 821-828 (2016).

Setou M, Nakagawa T, Seog DH, Hirokawa N. Kinesin superfamily motor protein KIF17 and mLin-10 in NMDA receptor-containing vesicle transport. *Science* **288**, 1796-1802 (2000).

Shaw P, Lerch JP, Pruessner JC, Taylor KN, Rose AB, Greenstein D, Clasen L, Evans A, Rapoport JL, Giedd JN. Cortical morphology in children and adolescents with different apolipoprotein E gene polymorphisms: an observational study. *Lancet Neurol.* **6**, 494-500 (2007).

Shen J, Kelleher RJ. The presenilin hypothesis of Alzheimer's disease: evidence for a loss-of-function pathogenic mechanism. *Proc. Natl. Acad. Sci. USA* **104**, 403-409 (2007).

Sherriff FE, Bridges LR, Sivaloganathan S. Early detection of axonal injury after human head trauma using immunocytochemistry for beta-amyloid precursor protein. *Acta Neuropathol.* **87**, 55-62 (1994).

Sims R, et al. Rare coding variants in PLCG2, ABI3, and TREM2 implicate microglial-mediated innate immunity in Alzheimer's disease. *Nat. Genet.* **49**, 1373-1384 (2017).

Snyder EM, et al. Regulation of NMDA receptor trafficking by amyloid-beta. *Nat. Neurosci.* **8**, 1051-1058 (2005).

Snyder HM, et al. Sex biology contributions to vulnerability to Alzheimer's disease: A think tank convened by the Women's Alzheimer's Research Initiative. *Alzheimers Dement.* **12**, 1186-1196 (2016).

Spencer JL, Waters EM, Romeo RD, Wood GE, Milner TA, McEwen BS. Uncovering the mechanisms of estrogen effects on hippocampal function. *Front. Neuroendocrinol.* **29**, 219-237 (2008).

Spitzer NC. Electrical activity in early neuronal development. *Nature* **444**, 707-712 (2006).

Stamer K, Vogel R, Thies E, Mandelkow E, Mandelkow EM. Tau blocks traffic of organelles, neurofilaments, and APP vesicles in neurons and enhances oxidative stress. *J. Cell Biol.* **156**, 1051-1063 (2002).

Stokin GB, et al. Axonopathy and transport deficits early in the pathogenesis of Alzheimer's disease. *Science* **307**, 1282-1288 (2005).

Storey E, Katz M, Brickman Y, Beyreuther K, Masters CL. Amyloid precursor protein of Alzheimer's disease: evidence for a stable, full-length, trans-membrane pool in primary neuronal cultures. *Eur. J. Neurosci.* **11**, 1779-1788 (1999).

Strittmatter WJ, Saunders AM, Schmechel D, Pericak-Vance M, Enghild J, Salvesen GS, Roses AD. Apolipoprotein E: high-avidity binding to beta-amyloid and increased frequency of type 4 allele in late-onset familial Alzheimer disease. *Proc. Natl. Acad. Sci. USA* **90**, 1977-1981 (1993).

Sun JJ, Kilb W, Luhmann HJ. Self-organization of repetitive spike patterns in developing neuronal networks in vitro. *Eur. J. Neurosci.* **32**, 1289-1299 (2010).

Sun L, Zhou R, Yang G, Shi Y. Analysis of 138 pathogenic mutations in presenilin-1 on the in vitro production of A $\beta$ 42 and A $\beta$ 40 peptides by  $\gamma$ -secretase. *Proc. Natl. Acad. Sci. USA* **114**, E476-E485 (2017).

Takami K, Terai K, Matsuo A, Walker DG, McGeer PL. Expression of presenilin-1 and -2 mRNAs in rat and Alzheimer's disease brains. *Brain Res.* **748**, 122-130 (1997).

Tatsuki F, et al. Involvement of Ca(2+)-dependent hyperpolarization in sleep duration in mammals. *Neuron* **90**, 70-85 (2016).

Teich AF, Patel M, Arancio O. A reliable way to detect endogenous murine  $\beta$ -amyloid. *PLoS One* **8**, e55647 (2013).

Terry RD, Masliah E, Salmon DP, Butters N, DeTeresa R, Hill R, Hansen LA, Katzman R. Physical basis of cognitive alterations in Alzheimer's disease: synapse loss is the major correlate of cognitive impairment. *Ann. Neurol.* **30**, 572-580 (1991).

Tissir F, Goffinet AM. Reelin and brain development. *Nat. Rev. Neurosci.* **4**, 496-505 (2003).

Verges DK, Restivo JL, Goebel WD, Holtzman DM, Cirrito JR. Opposing synaptic regulation of amyloid- $\beta$  metabolism by NMDA receptors in vivo. *J. Neurosci.* **31**, 11328-11337 (2011).

Vezzani A, Serafini R, Stasi MA, Caccia S, Conti I, Tridico RV, Samanin R. Kinetics of MK-801 and its effect on quinolinic acid-induced seizures and neurotoxicity in rats. *J. Pharmacol. Exp. Ther.* **249**, 278-283 (1989).

Wallace W, Ahlers ST, Gotlib J, Bragin V, Sugar J, Gluck R, Shea PA, Davis KL, Haroutunian V. Amyloid precursor protein in the cerebral cortex is rapidly and persistently induced by loss of subcortical innervation. *Proc. Natl. Acad. Sci. USA* **90**, 8712-8716 (1993).

Wang Y, Mandelkow E. Tau in physiology and pathology. *Nat. Rev. Neurosci.* **17**, 5-21 (2016).

Watkins JC, Krogsgaard-Larsen P, Honore T. Structure-activity relationships in the development of excitatory amino acid receptor agonists and competitive antagonists. *Trends Pharmacol. Sci.* **11**, 25-33 (1990).

Westermarck GT, Fändrich M, Westermarck P. AA amyloidosis: pathogenesis and targeted therapy. *Annu. Rev. Pathol.* **10**, 321-344 (2015).

Wiseman FK, Al-Janabi T, Hardy J, Karmiloff-Smith A, Nizetic D, Tybulewicz VL, Fisher EM, Strydom A. A genetic cause of Alzheimer disease: mechanistic insights from Down syndrome. *Nat. Rev. Neurosci.* **16**, 564-574 (2015).

Woolley CS, Weiland NG, McEwen BS, Schwartzkroin PA. Estradiol increases the sensitivity of hippocampal CA1 pyramidal cells to NMDA receptor-mediated synaptic input: correlation with dendritic spine density. *J. Neurosci.* **17**, 1848-1859 (1997).

Xia D, Watanabe H, Wu B, Lee SH, Li Y, Tsvetkov E, Bolshakov VY, Shen J, Kelleher RJ 3rd. Presenilin-1 knockin mice reveal loss-of-function mechanism for familial Alzheimer's disease. *Neuron* **85**, 967-981 (2015).

Zerche M, et al. Preexisting Serum Autoantibodies Against the NMDAR Subunit NR1 Modulate Evolution of Lesion Size in Acute Ischemic Stroke. *Stroke* **46**, 1180-1186 (2015).

Zhou JY, et al. Simple sodium dodecyl sulfate-assisted sample preparation method for LC-MS-based proteomics applications. *Anal. Chem.* **84**, 2862-2867 (2012).

## Supplemental information

**Statistical details.** Statistical evaluations were generally done as parametric Two-way ANOVA or parametric One-way ANOVA as indicated. Pertaining to all Two-way ANOVAs, factor 1 (indexed as subscript<sub>1</sub>) relates to excitatory agonist exposure (NMDA or Glu), and factor 2 (indexed as subscript<sub>2</sub>) relates to excitatory antagonist (AP5) exposure.

In cases where the normality assumption or the equal variance assumption were not met at the  $p = 0.05$  level (normality test failed, n.t.f.; equal variance test failed, e.v.f.), the provided Two-way or One-way ANOVA results are complemented with the results of One-way ANOVA on Ranks evaluations, which are given in brackets below each of the retested parametric ANOVAs.

### **S1: Statistical details figure 1**

Evaluations were done by Two-way ANOVA.

#### **(b)**

##### **low K<sup>+</sup>:**

anti-AT8:  $F_1 = 1.580$ , d.f. = 2,  $p_1 = 0.246$ ;  $F_2 = 22.825$ , d.f. = 1,  $p_2 < 0.001$ ;  $n = 3$ ;  
anti-S404:  $F_1 = 1.608$ , d.f. = 2,  $p_1 = 0.241$ ;  $F_2 = 12.531$ , d.f. = 1,  $p_2 = 0.004$ ;  $n = 3$ ;  
anti-S396:  $F_1 = 0.489$ , d.f. = 2,  $p_1 = 0.625$ ;  $F_2 = 7.608$ , d.f. = 1,  $p_2 = 0.017$ ;  $n = 3$ ; n.t.f.;  
[anti-S396:  $H = 7.111$ , d.f. = 5,  $p = 0.212$ ;  $n = 3$ ].

##### **high K<sup>+</sup>:**

anti-AT8:  $F_1 = 0.797$ , d.f. = 2,  $p_1 = 0.473$ ;  $F_2 = 6.660$ , d.f. = 1,  $p_2 = 0.024$ ;  $n = 3$ ;  
anti-S404:  $F_1 = 1.245$ , d.f. = 2,  $p_1 = 0.322$ ;  $F_2 = 40.611$ , d.f. = 1,  $p_2 < 0.001$ ;  $n = 3$ ;  
anti-S396:  $F_1 = 0.316$ , d.f. = 2,  $p_1 = 0.735$ ;  $F_2 = 7.731$ , d.f. = 1,  $p_2 = 0.017$ ;  $n = 3$ .

#### **(c)**

##### **low/high K<sup>+</sup> combined:**

anti-AT8:  $F_1 = 2.263$ , d.f. = 2,  $p_1 = 0.122$ ;  $F_2 = 26.695$ , d.f. = 1,  $p_2 < 0.001$ ;  $n = 6$ ;  
anti-S404:  $F_1 = 2.034$ , d.f. = 2,  $p_1 = 0.148$ ;  $F_2 = 43.670$ , d.f. = 1,  $p_2 < 0.001$ ;  $n = 6$ ; e.v.f.;  
[anti-S404:  $H = 22.100$ , d.f. = 5,  $p < 0.001$ ;  $n = 6$ ];  
anti-S396:  $F_1 = 0.948$ , d.f. = 2,  $p_1 = 0.399$ ;  $F_2 = 18.806$ , d.f. = 1,  $p_2 < 0.001$ ;  $n = 6$ ; n.t.f.;  
[anti-S396:  $H = 17.523$ , d.f. = 5,  $p = 0.004$ ;  $n = 6$ ].

#### **(e)**

##### **low K<sup>+</sup>:**

$F_1 = 2.506$ , d.f. = 2,  $p_1 = 0.110$ ;  $F_2 = 4.963$ , d.f. = 1,  $p_2 = 0.039$ ;  $n = 4$ .

##### **high K<sup>+</sup>:**

$F_1 = 2.999$ , d.f. = 2,  $p_1 = 0.075$ ;  $F_2 = 0.201$ , d.f. = 1,  $p_2 = 0.659$ ;  $n = 4$ .

#### **(f)**

##### **low K<sup>+</sup>:**

$F_1 = 3.784$ , d.f. = 2,  $p_1 = 0.042$ ;  $F_2 = 3.811$ , d.f. = 1,  $p_2 = 0.067$ ;  $n = 4$ ; n.t.f.;  
[ $H = 8.306$ , d.f. = 5,  $p = 0.140$ ;  $n = 4$ ].

##### **high K<sup>+</sup>:**

$F_1 = 6.184$ , d.f. = 2,  $p_1 = 0.009$ ;  $F_2 = 3.939$ , d.f. = 1,  $p_2 = 0.063$ ;  $n = 4$ .

### **S2: Statistical details figure 2**

Evaluations were done by Two-way ANOVA.

#### **(b)**

##### **low K<sup>+</sup>:**

$F_1 = 1.787$ , d.f. = 2,  $p_1 = 0.209$ ;  $F_2 = 31.863$ , d.f. = 1,  $p_2 < 0.001$ ;  $n = 3$ .

##### **high K<sup>+</sup>:**

$F_1 = 0.012$ , d.f. = 2,  $p_1 = 0.988$ ;  $F_2 = 6.438$ , d.f. = 1,  $p_2 < 0.001$ ;  $n = 3$ .

**(c)**

**low/high K<sup>+</sup> combined:**

$F_1 = 1.367$ , d.f. = 2,  $p_1 = 0.270$ ;  $F_2 = 89.790$ , d.f. = 1,  $p_2 < 0.001$ ;  $n = 6$ ; e.v.f.;  
[H = 28.581, d.f. = 5,  $p < 0.001$ ;  $n = 6$ ].

**(d)**

**low/high K<sup>+</sup> combined:**

**A $\beta$ <sub>40</sub>:**

$F_1 = 2.493$ , d.f. = 2,  $p_1 = 0.100$ ;  $F_2 = 10.392$ , d.f. = 1,  $p_2 = 0.003$ ;  $n = 6$ ; n.t.f.;  
[H = 13.533, d.f. = 5,  $p = 0.019$ ;  $n = 6$ ].

**A $\beta$ <sub>42</sub>:**

$F_1 = 0.245$ , d.f. = 2,  $p_1 = 0.784$ ;  $F_2 = 0.009$ , d.f. = 1,  $p_2 = 0.925$ ;  $n = 6$ ; n.t.f.;  
[H = 5.230, d.f. = 5,  $p = 0.388$ ;  $n = 6$ ].

### **S3: Statistical details figure 3**

Evaluations were done by One-way ANOVA.

**(b)**

**Hippocampus:**

anti-AT8:  $F = 2.120$ , d.f. = 2,  $p = 0.163$ ;  $n = 5$ ;  
anti-S404:  $F = 5.327$ , d.f. = 2,  $p = 0.022$ ;  $n = 5$ ; n.t.f.;  
[anti-S404: H = 7.220, d.f. = 2,  $p = 0.027$ ;  $n = 5$ ];  
anti-S396:  $F = 0.582$ , d.f. = 2,  $p = 0.574$ ;  $n = 5$ .

**(d)**

**Cortex:**

anti-AT8:  $F = 9.998$ , d.f. = 2,  $p = 0.003$ ;  $n = 5$ ;  
anti-S404:  $F = 5.970$ , d.f. = 2,  $p = 0.016$ ;  $n = 5$ ;  
anti-S396:  $F = 2.388$ , d.f. = 2,  $p = 0.134$ ;  $n = 5$ .

**(e)**

**Thalamus:**

anti-AT8:  $F = 0.068$ , d.f. = 2,  $p = 0.935$ ;  $n = 5$ ;  
anti-S404:  $F = 1.137$ , d.f. = 2,  $p = 0.353$ ;  $n = 5$ ;  
anti-S396:  $F = 2.470$ , d.f. = 2,  $p = 0.126$ ;  $n = 5$ .

### **S4: Statistical details figure 4**

Evaluations were done by One-way ANOVA.

**(d)**

**Hippocampus:**

$F = 11.945$ , d.f. = 2,  $p = 0.001$ ;  $n = 5$ .

**Cortex:**

$F = 7.635$ , d.f. = 2,  $p = 0.007$ ;  $n = 5$ .

**Thalamus:**

$F = 4.207$ , d.f. = 2,  $p = 0.041$ ;  $n = 5$ .

**(e)**

**Hippocampus:**

$F = 4.588$ , d.f. = 2,  $p = 0.029$ ;  $n = 7$  for Ctrl,  $n = 5$  for 4 h and 24 h.

**Cortex:**

$F = 2.312$ , d.f. = 2,  $p = 0.136$ ;  $n = 7$  for Ctrl,  $n = 5$  for 4 h and 24 h.

**Thalamus:**

$F = 2.585$ , d.f. = 2,  $p = 0.111$ ;  $n = 7$  for Ctrl,  $n = 5$  for 4 h and 24 h.

**Entorhinal cortex:**

$F = 0.536$ , d.f. = 2,  $p = 0.597$ ;  $n = 7$  for Ctrl,  $n = 5$  for 4 h and 24 h; n.t.f.;  
[ $H = 1.294$ , d.f. = 2,  $p = 0.524$ ;  $n = 7$  for Ctrl,  $n = 5$  for 4 h and 24 h].

**Retrosplenial cortex:**

$F = 5.690$ , d.f. = 2,  $p = 0.016$ ;  $n = 7$  for Ctrl,  $n = 5$  for 4 h and 24 h; n.t.f.;  
[ $H = 7.228$ , d.f. = 2,  $p = 0.027$ ;  $n = 7$  for Ctrl,  $n = 5$  for 4 h and 24 h].

**Caudate/putamen:**

$F = 2.440$ , d.f. = 1,  $p = 0.149$ ;  $n = 7$  for Ctrl,  $n = 5$  for 4 h; n.t.f.;  
[ $H = 2.656$ , d.f. = 1,  $p = 0.106$ ;  $n = 7$  for Ctrl,  $n = 5$  for 4 h].

**(f)**

**Hippocampus:**

$F = 6.509$ , d.f. = 2,  $p = 0.010$ ;  $n = 7$  for Ctrl,  $n = 5$  for 4 h and 24 h.

**Cortex:**

$F = 4.355$ , d.f. = 2,  $p = 0.034$ ;  $n = 7$  for Ctrl,  $n = 5$  for 4 h and 24 h.

**Thalamus:**

$F = 13.313$ , d.f. = 2,  $p < 0.001$ ;  $n = 7$  for Ctrl,  $n = 5$  for 4 h and 24 h.

**Entorhinal cortex:**

$F = 1.460$ , d.f. = 2,  $p = 0.266$ ;  $n = 7$  for Ctrl,  $n = 5$  for 4 h and 24 h.

**Retrosplenial cortex:**

$F = 0.034$ , d.f. = 2,  $p = 0.966$ ;  $n = 7$  for Ctrl,  $n = 5$  for 4 h and 24 h; n.t.f.;  
[ $H = 0.070$ , d.f. = 2,  $p = 0.966$ ;  $n = 7$  for Ctrl,  $n = 5$  for 4 h and 24 h].

**Caudate/putamen:**

$F = 2.645$ , d.f. = 1,  $p = 0.135$ ;  $n = 7$  for Ctrl,  $n = 5$  for 4 h; n.t.f.;  
[ $H = 1.905$ , d.f. = 1,  $p = 0.202$ ;  $n = 7$  for Ctrl,  $n = 5$  for 4 h].

**(g)**

**Hippocampus:**

$F = 5.754$ , d.f. = 2,  $p = 0.015$ ;  $n = 7$  for Ctrl,  $n = 5$  for 4 h and 24 h.

**Cortex:**

$F = 1.168$ , d.f. = 2,  $p = 0.340$ ;  $n = 7$  for Ctrl,  $n = 5$  for 4 h and 24 h.

**Thalamus:**

$F = 5.924$ , d.f. = 2,  $p = 0.014$ ;  $n = 7$  for Ctrl,  $n = 5$  for 4 h and 24 h.

**Entorhinal cortex:**

$F = 0.426$ , d.f. = 2,  $p = 0.661$ ;  $n = 7$  for Ctrl,  $n = 5$  for 4 h and 24 h; n.t.f.;  
[ $H = 1.425$ , d.f. = 2,  $p = 0.490$ ;  $n = 7$  for Ctrl,  $n = 5$  for 4 h and 24 h].

**Retrosplenial cortex:**

$F = 5.299$ , d.f. = 2,  $p = 0.019$ ;  $n = 7$  for Ctrl,  $n = 5$  for 4 h and 24 h.

**Caudate/putamen:**

$F = 5.335$ , d.f. = 1,  $p = 0.044$ ;  $n = 7$  for Ctrl,  $n = 5$  for 4 h; n.t.f.;  
[ $H = 4.121$ , d.f. = 1,  $p = 0.048$ ;  $n = 7$  for Ctrl,  $n = 5$  for 4 h].

**(h)**

**Hippocampus:**

anti-ADAM10:  $F = 2.621$ , d.f. = 2,  $p = 0.114$ ;  $n = 5$ ;

anti-BACE1:  $F = 0.334$ , d.f. = 2,  $p = 0.722$ ;  $n = 5$ ;

anti-PS1:  $F = 5.233$ , d.f. = 2,  $p = 0.023$ ;  $n = 5$ .

**Cortex:**

anti-ADAM10:  $F = 5.027$ , d.f. = 2,  $p = 0.026$ ;  $n = 5$ ;

anti-BACE1:  $F = 2.056$ , d.f. = 2,  $p = 0.171$ ;  $n = 5$ ;

anti-PS1:  $F = 6.826$ , d.f. = 2,  $p = 0.010$ ;  $n = 5$ .

**Thalamus:**

anti-ADAM10:  $F = 4.132$ , d.f. = 2,  $p = 0.043$ ;  $n = 5$ ;

anti-BACE1:  $F = 1.735$ , d.f. = 2,  $p = 0.218$ ;  $n = 5$ ;

anti-PS1:  $F = 0.412$ , d.f. = 2,  $p = 0.671$ ;  $n = 5$ ; n.t.f.;

[anti-PS1:  $H = 1.460$ , d.f. = 2,  $p = 0.482$ ;  $n = 5$ ].



### **S5: Statistical details figure 5**

Evaluations were done by One-way ANOVA.

**(b)**

#### **Hippocampus:**

anti-AT8:  $F = 1.011$ , d.f. = 1,  $p = 0.335$ ;  $n = 7$ ;  
anti-S404:  $F = 0.371$ , d.f. = 1,  $p = 0.554$ ;  $n = 7$ ;  
anti-S396:  $F = 0.000$ , d.f. = 1,  $p = 0.996$ ;  $n = 7$ ; e.v.f.;  
[anti-396:  $H = 0.004$ , d.f. = 1,  $p = 1.000$ ;  $n = 7$ ].

**(d)**

#### **Cortex:**

anti-AT8:  $F = 5.395$ , d.f. = 1,  $p = 0.039$ ;  $n = 7$ ;  
anti-S404:  $F = 9.143$ , d.f. = 1,  $p = 0.011$ ;  $n = 7$ ;  
anti-S396:  $F = 0.054$ , d.f. = 1,  $p = 0.819$ ;  $n = 7$ .

**(e)**

#### **Hippocampus:**

$F = 0.898$ , d.f. = 1,  $p = 0.362$ ;  $n = 7$ ; n.t.f.;  
[ $H = 0.102$ , d.f. = 1,  $p = 0.805$ ;  $n = 7$ ].

#### **Cortex:**

$F = 5.319$ , d.f. = 1,  $p = 0.039$ ;  $n = 7$ .

### **S6: Statistical details figure 6**

Evaluations were done by One-way ANOVA.

**(b)**

#### **Hippocampus:**

anti-AT8:  $F = 13.055$ , d.f. = 1,  $p = 0.004$ ;  $n = 7$ ; e.v.f.;  
[anti-AT8:  $H = 6.208$ , d.f. = 1,  $p = 0.011$ ;  $n = 7$ ];  
anti-S404:  $F = 12.466$ , d.f. = 1,  $p = 0.004$ ;  $n = 7$ ;  
anti-S396:  $F = 1.827$ , d.f. = 1,  $p = 0.201$ ;  $n = 7$ .

**(d)**

#### **Cortex:**

anti-AT8:  $F = 1.704$ , d.f. = 1,  $p = 0.216$ ;  $n = 7$ ; e.v.f.;  
[anti-AT8:  $H = 0.918$ , d.f. = 1,  $p = 0.383$ ;  $n = 7$ ];  
anti-S404:  $F = 16.652$ , d.f. = 1,  $p = 0.002$ ;  $n = 7$ ;  
anti-S396:  $F = 1.445$ , d.f. = 1,  $p = 0.252$ ;  $n = 7$ .

**(e)**

#### **Hippocampus:**

$F = 2.066$ , d.f. = 1,  $p = 0.176$ ;  $n = 7$ .

#### **Cortex:**

$F = 0.704$ , d.f. = 1,  $p = 0.418$ ;  $n = 7$ .

**(f)**

#### **Hippocampus:**

anti-ADAM10:  $F = 0.004$ , d.f. = 1,  $p = 0.949$ ;  $n = 7$ ;  
anti-BACE1:  $F = 0.654$ , d.f. = 1,  $p = 0.434$ ;  $n = 7$ ;  
anti-PS1:  $F = 6.026$ , d.f. = 1,  $p = 0.030$ ;  $n = 7$ .

#### **Cortex:**

anti-ADAM10:  $F = 0.012$ , d.f. = 1,  $p = 0.916$ ;  $n = 7$ ;  
anti-BACE1:  $F = 0.374$ , d.f. = 1,  $p = 0.552$ ;  $n = 7$ ;  
anti-PS1:  $F = 7.437$ , d.f. = 1,  $p = 0.018$ ;  $n = 7$ .

**S7: Statistical details figure 7**

Evaluations were done by One-way ANOVA.

**(b)**

**Cortex:**

anti-AT8:  $F = 16.543$ , d.f. = 1,  $p = 0.002$ ;  $n = 7$ ;

anti-S404:  $F = 12.572$ , d.f. = 1,  $p = 0.004$ ;  $n = 7$ ; n.t.f.;

[anti-S404:  $H = 8.265$ , d.f. = 1,  $p = 0.002$ ;  $n = 7$ ];

anti-S396:  $F = 9.747$ , d.f. = 1,  $p = 0.009$ ;  $n = 7$ ; e.v.f.;

[anti-S396:  $H = 6.208$ , d.f. = 1,  $p = 0.011$ ;  $n = 7$ ].

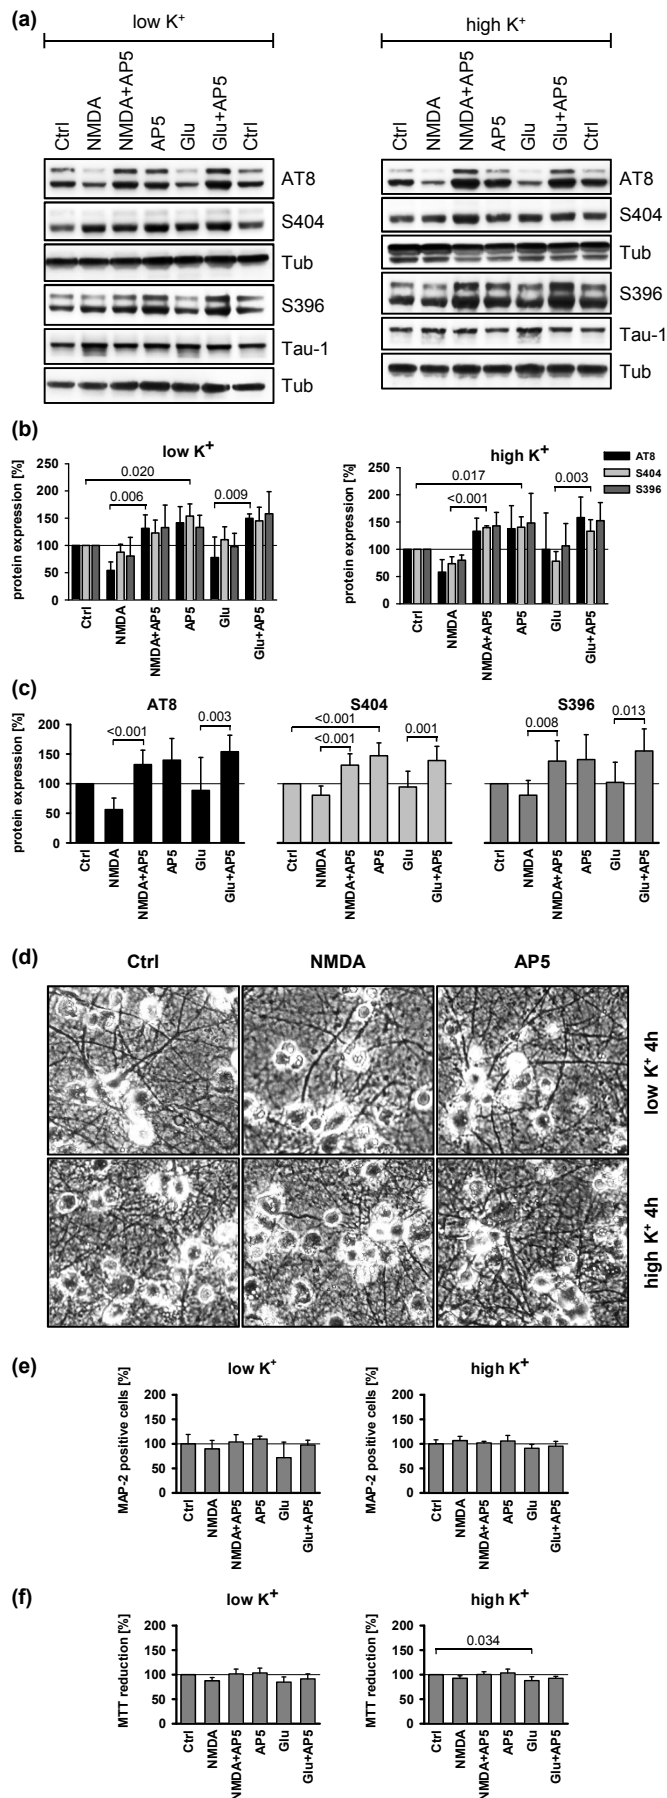

Figure 1

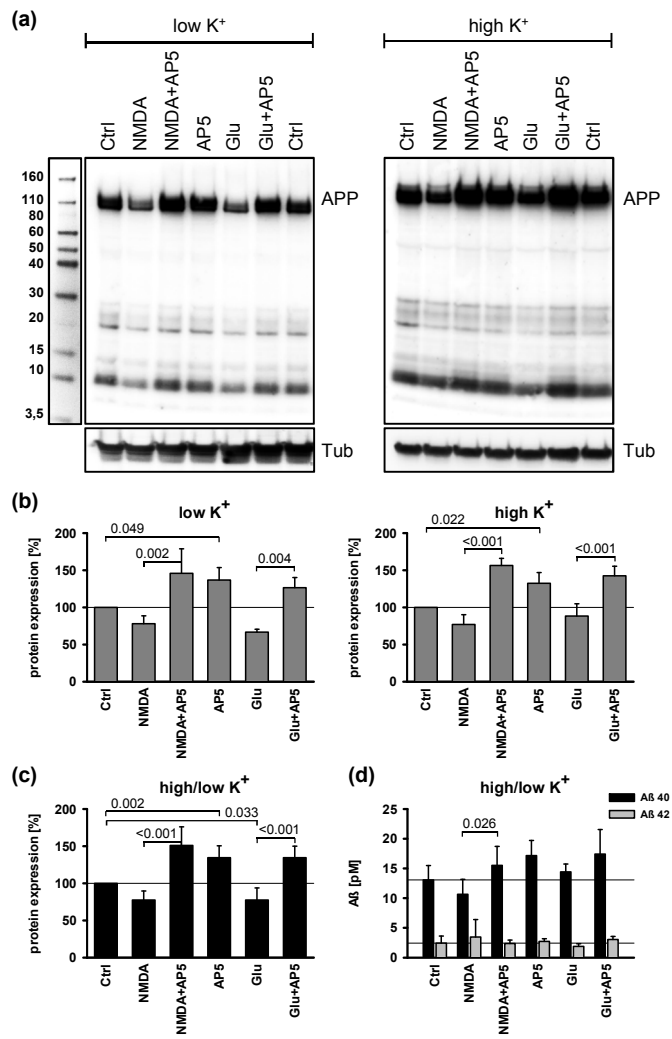

Figure 2

**(a) Hippocampus**

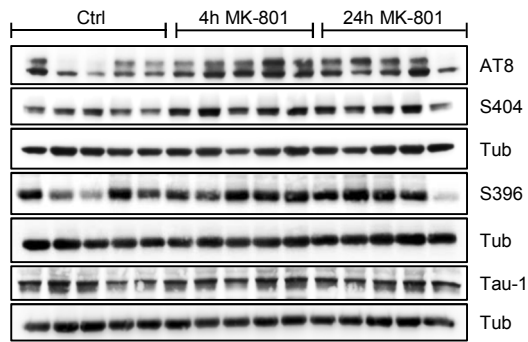

**(b)**

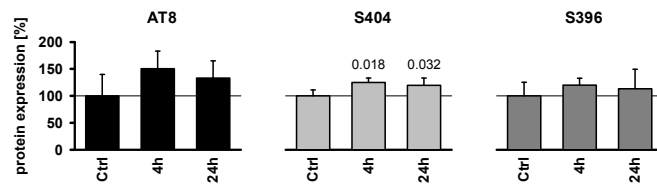

**(c) Cortex**

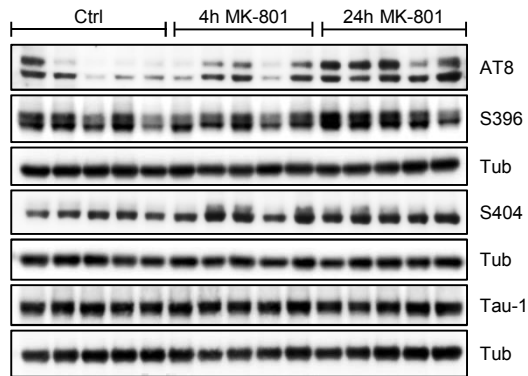

**(d)**

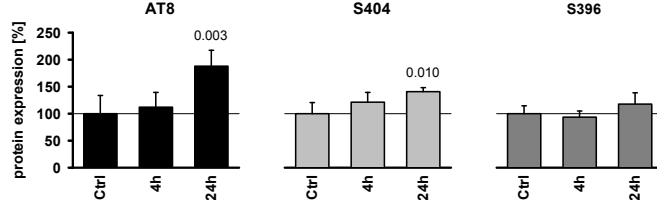

**(e) Thalamus**

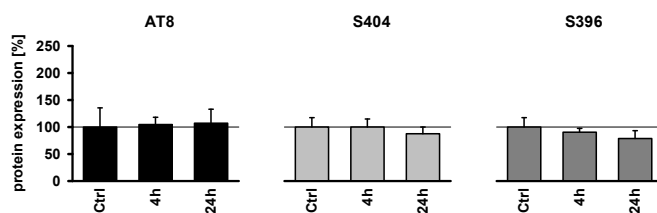

Figure 3

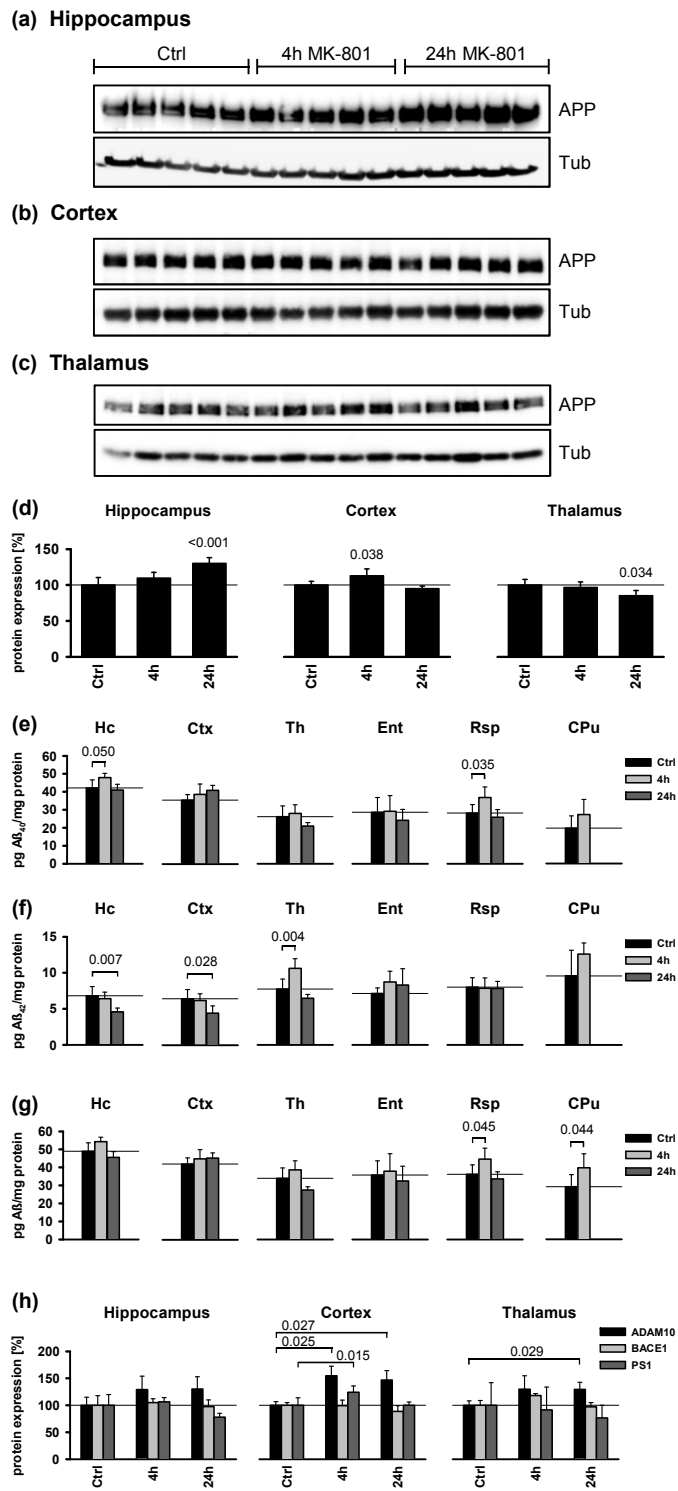

Figure 4

**(a) Hippocampus**

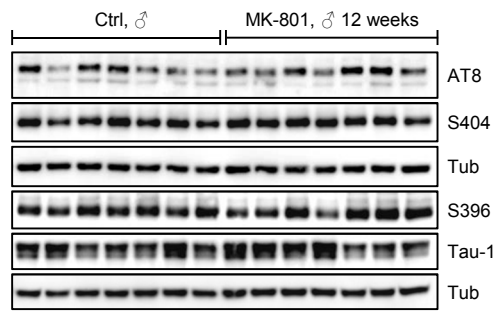

**(b)**

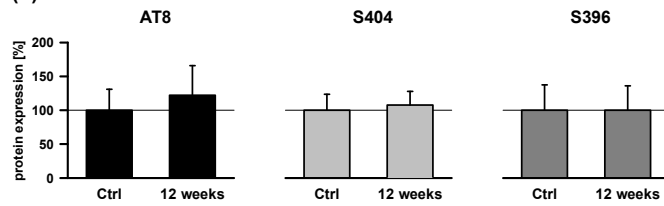

**(c) Cortex**

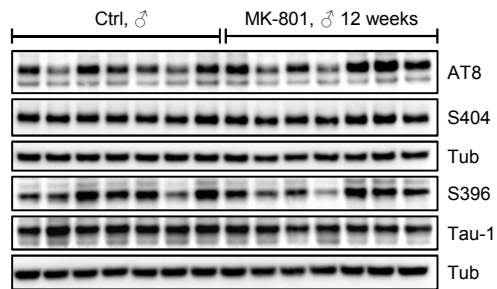

**(d)**

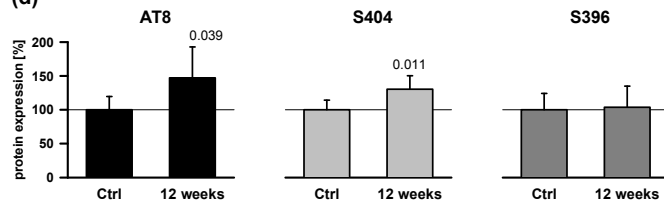

**(e)**

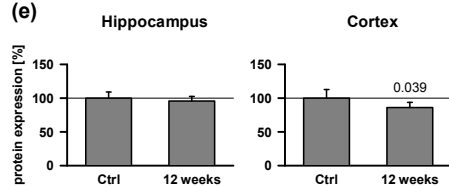

Figure 5

**(a) Hippocampus**

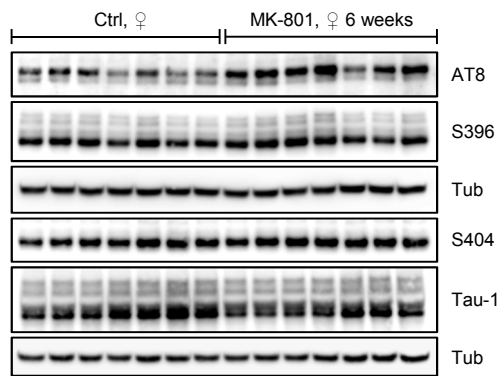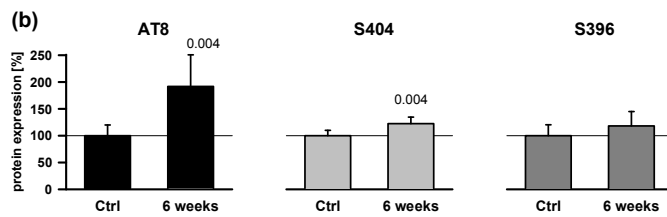

**(c) Cortex**

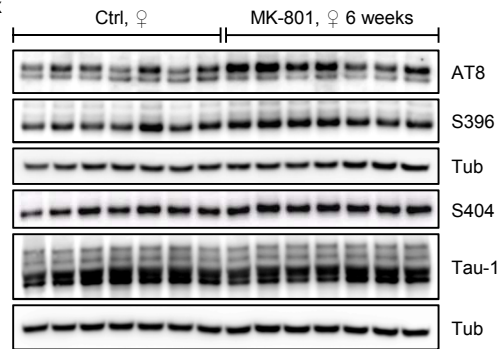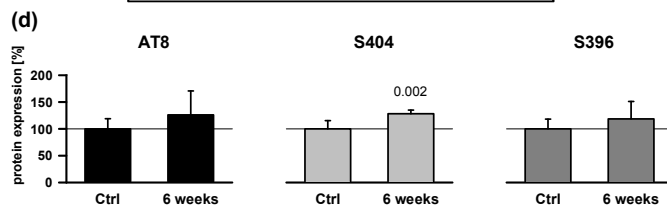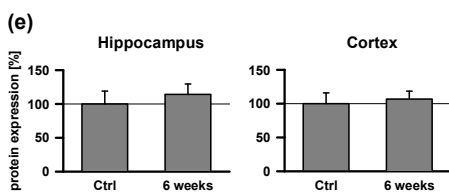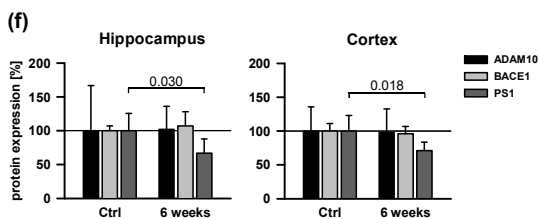

Figure 6



(a) Cortex

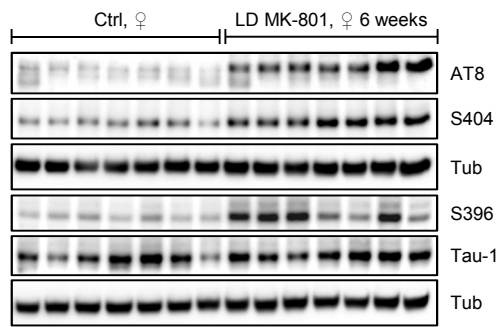

(b)

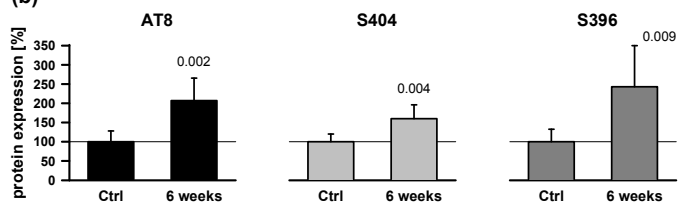

Figure 7

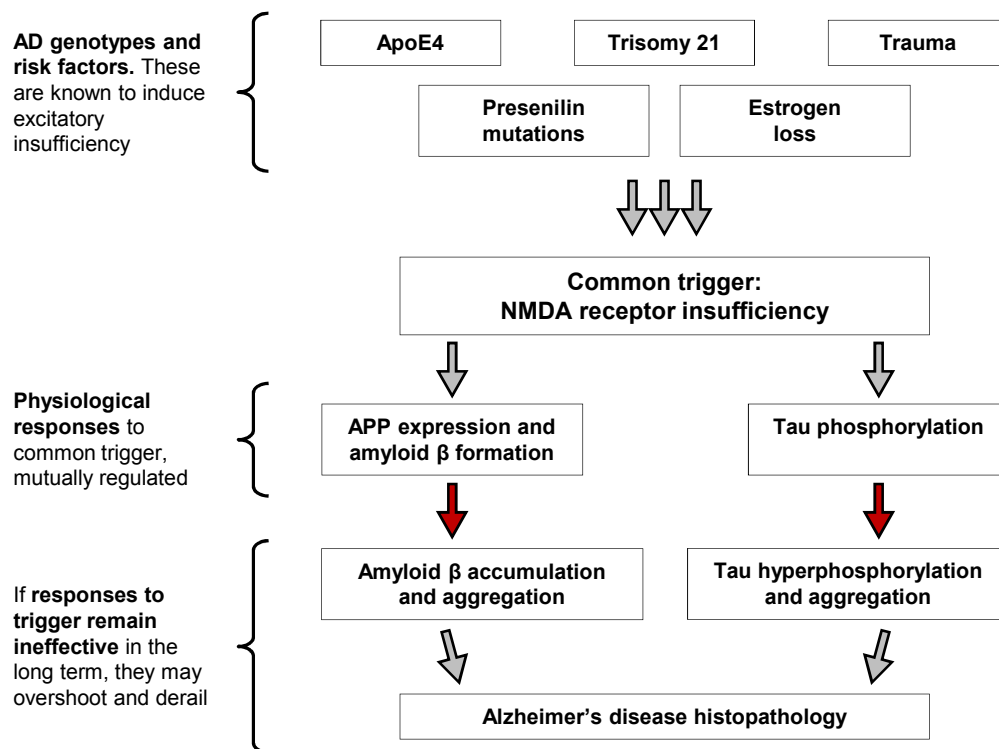

Figure 8
